1 **Loss of Kallmann syndrome-associated gene WDR11 disrupts primordial germ cell**  
2 **development by affecting canonical and non-canonical Hedgehog signalling**

3

4

5 Jiyoung Lee<sup>1</sup>, Yeonjoo Kim<sup>1</sup>, Paris Ataliotis<sup>1</sup>, Hyung-Goo Kim<sup>2</sup>, Dae-Won Kim<sup>3</sup>, Dorothy  
6 C. Bennett<sup>1</sup>, Nigel A. Brown<sup>1</sup>, Lawrence C. Layman<sup>4</sup> and Soo-Hyun Kim<sup>1\*</sup>

7

8

9 <sup>1</sup>Molecular and Clinical Sciences Research Institute, St. George's, University of London,  
10 London, UK; <sup>2</sup>Neurological Disorders Research Center, Qatar Biomedical Research  
11 Institute, Hamad Bin Khalifa University, Doha, Qatar; <sup>3</sup>Department of Biochemistry,  
12 Yonsei University, Seoul, Republic of Korea; <sup>4</sup>Section of Reproductive Endocrinology,  
13 Infertility and Genetics; Department of Obstetrics and Gynecology; Department of  
14 Neuroscience and Regenerative Medicine; Department of Physiology, Medical College  
15 of Georgia, Augusta University, Augusta, USA.

16

17

18 \*Correspondence to [skim@sgul.ac.uk](mailto:skim@sgul.ac.uk)

19

20

21

22 Short title: WDR11 and primordial germ cell development

23

24 Key words: WDR11, Kallmann syndrome, primordial germ cell, Hedgehog signalling,  
25 primary cilia

26

27 **ABSTRACT**

28

29 Mutations of *WDR11* are associated with Kallmann syndrome (KS) and congenital  
30 hypogonadotropic hypogonadism (CHH), typically caused by defective functions of  
31 gonadotrophin-releasing hormone (GnRH) neurones in the brain. We previously reported  
32 that *Wdr11* knockout mice show profound infertility with significantly fewer germ cells  
33 present in the gonads. To understand the underlying mechanisms mediated by WDR11  
34 in these processes, we investigated the effects of *Wdr11* deletion on primordial germ cell  
35 (PGC) development. Using live-tracking of PGCs and primary co-cultures of genital  
36 ridges (GR), we demonstrated that *Wdr11*-deficient embryos contained reduced numbers  
37 of PGCs which had delayed migration due to significantly decreased proliferation and  
38 motility. We found primary cilia-dependent canonical Hedgehog (Hh) signalling was  
39 required for proliferation of the somatic mesenchymal cells of GR, while primary cilia-  
40 independent non-canonical Hh signalling mediated by *Ptch2/Gas1* and downstream  
41 effectors *Src* and *Creb* was required for PGC proliferation and migration, which was  
42 disrupted by the loss of function mutations of WDR11. Therefore, canonical and non-  
43 canonical Hh signalling are differentially involved in the development of somatic and germ  
44 cell components of the gonads, and WDR11 is required for both of these pathways  
45 operating in parallel in GR and PGCs, respectively, during normal PGC development.  
46 Our study provides a mechanistic link between the development of GnRH neurones and  
47 germ cells mediated by WDR11, which may underlie some cases of KS/CHH and  
48 ciliopathies.

49

50

51  
52  
53

## INTRODUCTION

54 Genetic defects affecting the development, integration and coordination of the  
55 hypothalamic-pituitary-gonadal (HPG) axis constitute most of the aetiologies in Kallmann  
56 syndrome (KS) and idiopathic congenital hypogonadotropic hypogonadism (CHH),  
57 clinically defined by low plasma levels of sex steroids and gonadotropins with  
58 absent/delayed sexual maturation and infertility. KS patients also present with anosmia,  
59 a lack of the sense of smell (1). Current doctrine is that CHH/KS is a hypothalamic and/or  
60 pituitary disease caused by inappropriate development or failed reactivation of  
61 gonadotrophin-releasing hormone (GnRH) neurons at puberty. Therefore, infertility in  
62 patients with KS/CHH is routinely treated by GnRH or gonadotropin replacement therapy  
63 (2;3). The majority of male patients (75-95%) show normalised testosterone levels after  
64 treatment. However, only 5-20% of them achieve normal sperm concentrations and 20-  
65 40% show azoospermia, while the remainder exhibit severe oligospermia (1;4-6). These  
66 findings suggest that primary defects in the gonads may exist in these individuals.

67

68 Previously, we identified *WDR11* as a genetic locus for KS/CHH (7). Missense variants  
69 of *WDR11* have also been reported in septo-optic dysplasia, combined pituitary hormone  
70 deficiency and pituitary stalk interruption syndrome (8-10). *WDR11* belongs to a family  
71 of proteins with the evolutionarily conserved WD40-repeat (WDR) domains, forming  $\beta$ -  
72 propeller structures known to mediate protein-protein interactions (7;11). Our previous  
73 studies of a *Wdr11* knockout (KO) mouse model have indicated a critical role for *WDR11*  
74 in development (12). *Wdr11* is required for normal ciliogenesis as loss of *Wdr11* resulted  
75 in short and infrequent primary cilia. Since multiple developmental signalling pathways  
76 functionally rely on primary cilia, the majority of *Wdr11* KO embryos die in utero at mid-  
77 gestation (after E12.5) with severe developmental defects (12). Those rare individual

78 mice that survived through adulthood display features overlapping with KS/CHH such as  
79 delayed puberty and infertility, accompanied by reduced levels of GnRH and  
80 gonadotrophins. Migration of GnRH neurones is disrupted in these mice causing reduced  
81 total numbers of GnRH neurones reaching the hypothalamus. In addition, *Wdr11* KO  
82 mice are born with hypoplastic gonads containing fewer germ cells compared to the wild  
83 type (WT) littermates. *Wdr11*-deficient testes are smaller in size and contain fewer  
84 spermatocytes and spermatids with an increased frequency of morphologically abnormal  
85 sperm found in the seminiferous tubules (12). *Wdr11*-deficient ovaries are also smaller  
86 than WT and present with disproportionally higher numbers of oogonia or primordial  
87 follicles and reduced numbers of mature follicles (12). These data indicate that loss of  
88 *Wdr11* results in defective development of germ cells and gonads in both sexes.

89  
90 Primordial germ cells (PGCs) are bipotential stem cells and the founders of gametes.  
91 They undergo distinctive developmental stages (specification, polarization, migration and  
92 invasion) before they become immobile and differentiate into either spermatozoa or  
93 oocytes in the gonads (13-15). In mouse, PGCs originate from the posterior primitive  
94 streak (E7.5) and move into the developing hindgut where they migrate along its anterior  
95 extension (E8-E9.5). Then they move out of the hindgut, travel through the mesentery of  
96 the dorsal body wall, and finally enter the bilateral genital ridges (GR) (E10.5) (13;14).  
97 Normal development and migration of PGCs are regulated by networks of signalling  
98 molecules and receptors expressed in the microenvironment of the germ cell niche,  
99 including chemokine SDF1 and its receptor CXCR4 (16;17). Interestingly, SDF1 and  
100 CXCR4 are also important in GnRH neuron migration, and decreased numbers of GnRH  
101 neurons are observed in *Cxcr4* knockout mice (18).

102

103 Hedgehog (Hh) is a major morphogen that binds to the cell surface receptors Ptch1 and  
104 Ptch2. Boc (bioregional Cdon binding protein), Cdon (cell-adhesion-molecule-  
105 related/downregulated by oncogenes, also called as Cdo) and Gas1 (growth arrest-  
106 specific gene 1) are membrane-associated co-receptors that interact with the primary  
107 Ptch receptors (19-22). They can bind Hh ligand independently of Ptch, facilitating  
108 ligand–receptor interactions at the cell surface (19). We recently reported that they are  
109 critically required for selective activation of Smo-downstream signalling (20). Gli  
110 transcription factors mediate canonical Hh signalling pathway via primary cilia-dependent  
111 mechanisms. Gli-independent non-canonical signalling also occurs, which does not  
112 require Smo localisation to the primary cilia (20;23;24). Studies in *Drosophila* and  
113 zebrafish have previously demonstrated that Hh signalling is involved in the development  
114 of PGCs, but not as a guidance cue or fate determinant (25-27). It was shown that Sonic  
115 Hedgehog (Shh) is not a chemo-attractant for PGCs in the mouse but non-canonical Hh  
116 signalling mediated by the Ptch2/Gas1 receptor complex, exclusively expressed on the  
117 surface of PGCs, is important in PGC motility (20). Notably, putative mutations of Hh  
118 signalling pathway genes including *GLI*, *SMO* and *PTCH1* have been suggested in  
119 *KS/CHH* (28-30).

120

121 Here we investigate the potential involvement of the *KS/CHH*-associated gene *WDR11*  
122 in the establishment of germ cells in the gonads. Our data demonstrate that *Wdr11* is  
123 essential for the proliferation and migration of PGCs as well as the growth of the  
124 surrounding soma, mediated by non-canonical and canonical Hh signalling, respectively.  
125 We propose that in addition to the hypothalamic GnRH deficiency, primary defects in the  
126 germ cells may underlie *KS/CHH* patients with *WDR11* mutations. The mechanisms we  
127 revealed may apply to other ciliopathies where hypogonadism and infertility are part of  
128 the clinical features.

129

## 130 **RESULTS**

131

### 132 **WDR11 is expressed in the PGC developmental niche**

133 Initial analyses by RT-PCR showed that Wdr11 was expressed in the developing and  
134 adult urogenital organs of both sexes. Wdr11 mRNA was present in the regions through  
135 which PGCs migrate including the hindgut (HG) at E9.5 and the urogenital ridge area  
136 (UG) at E10.5 - 11.5. Wdr11 was also expressed in the post-pubertal testis, epididymis,  
137 ovary and kidney (Fig 1A). The spatio-temporal expression of Wdr11 in the developing  
138 urogenital system was further demonstrated by whole mount X-gal staining in Wdr11  
139 heterozygote embryos (Fig 1C) and by direct immunofluorescence staining for Wdr11  
140 (Fig 1D). Both methods indicated widespread expression in gonadal development  
141 including HG and mesonephric tubules. Co-immunostaining with SSEA1, a carbohydrate  
142 antigen specifically expressed by PGCs, confirmed the expression of Wdr11 in individual  
143 PGCs as well as in the surrounding somatic cells, showing diffuse peri-nuclear and  
144 cytoplasmic signal, which was absent in Wdr11 KO embryos (Fig 1D). Based on this  
145 broad expression of Wdr11 in both the mesenchymal and germ cell components of the  
146 gonads, we hypothesised that Wdr11 may have broad effects in reproductive system  
147 development including PGCs.

148

### 149 **Loss of Wdr11 affects PGC migration**

150 We have previously reported that the gonads of Wdr11-deficient mice were unusually  
151 small, which may be caused, at least in part, by a deficiency of germ cells (12). Wdr11  
152 deficient mice showed ovaries containing reduced numbers of oocytes and testes  
153 containing significantly fewer spermatocytes (12). Since defective development of PGCs  
154 during early embryogenesis can result in insufficient numbers of germ cells present in the

155 gonads at birth, leading to in/sub-fertility or premature ovarian failure, we investigated  
156 whether the absence of *Wdr11* has any impact on PGC development.

157

158 First, we analysed the number and location of PGCs by anti-SSEA1 immunofluorescence  
159 and alkaline phosphatase staining at different developmental stages (E9.5 – E11.5). The  
160 results showed that *Wdr11*-null embryos were still populated with PGCs in their normal  
161 migratory path between the HG and GR, but many of them were inappropriately located  
162 for the stage of development (Fig 2A). Therefore, loss of *Wdr11* did not completely  
163 prevent the specification of PGCs, but disrupted their migration. When we quantified the  
164 total numbers of PGCs by counting the SSEA1-positive cells, there was a significant  
165 reduction in *Wdr11*<sup>-/-</sup> embryos compared to WT (Fig 2B). Our analyses confirmed an  
166 inappropriate accumulation of PGCs in the hindgut and mesentery, compared to WT at  
167 E10.5 (Fig 2C). This led to a significantly lower number of PGCs arriving in the GR at  
168 E10.5 in *Wdr11*<sup>-/-</sup> embryos (Fig 2C), and concomitantly a significantly higher number of  
169 ectopic PGCs (Fig 2D). Mis-localised PGCs fail to develop normally owing to the lack of  
170 survival signals from their environment. These data suggest that *Wdr11* KO caused  
171 impaired migration of PGCs, affecting germ cell establishment in the future gonads.

172

### 173 **Defective motility of *Wdr11*-deficient PGCs**

174 We hypothesised that *Wdr11* KO would affect at least one of the following key processes  
175 in PGC development: motility, proliferation or survival. First, we examined the motile  
176 behaviours of PGCs and quantitatively analysed their intrinsic motility. For this purpose,  
177 we have established embryo slice cultures of explanted GR of mice expressing a *Stella*  
178 promoter-driven GFP transgene (*Stella*<sup>GFP</sup>). *Stella* is the most specific marker for PGCs,  
179 being expressed soon after their specification at ~E7.5 and maintained until E13.5 in  
180 females and E15.5 in males (31). We performed a time-lapse live imaging and motion

181 analysis of PGCs in WT and *Wdr11* KO background using a *Stella*<sup>GFP</sup>;*Wdr11* hybrid strain  
182 at E10.5. The movements of PGCs in the time-lapse movies were manually tracked and  
183 analysed for directionality, targeting, distance and speed. When the migration over time  
184 (>10 hours) was compared in WT and *Wdr11*-null embryos, we found that PGCs in both  
185 genotypes were moving towards the GR area, showing no discernible differences in their  
186 targeting and directionality of migration (Fig 3A). To examine if *Wdr11* deficiency altered  
187 the intrinsic motility of PGCs, we performed quantitative motion analyses, which revealed  
188 that the velocity, accumulated distance and Euclidean distance of migration were  
189 significantly reduced in the *Wdr11* KO embryos (Fig 3B), consistent with the ectopic  
190 distribution of PGCs observed in our immunofluorescence experiments (Fig 2).  
191 Directionality values representing the degree to which the migratory path of a cell strayed  
192 from a straight line were not altered. Hence, the majority of the cells were still moving  
193 towards the GRs but the speed and distance of migration were reduced in *Wdr11* KO,  
194 resulting in a significantly reduced number of PGCs arriving at the GRs.

195

196 We observed some PGCs disintegrating progressively in our live-imaging, a hallmark of  
197 apoptotic cells (see supplementary movies 1 and 2). To ascertain whether the reduction  
198 in movement was due to reduced survival of PGCs in the mutants, we assessed the  
199 survival times by measuring the mean number of hours that the green fluorescence of  
200 individual cells could be observed in the movies and found no difference between the  
201 genotypes (Fig 3B). Combined, these data suggest that *Wdr11* is necessary for active  
202 PGC motility during migration towards the GRs but not the targeting and attraction of  
203 PGCs towards GRs, nor in maintaining survival.

204

205 **Defective proliferation but normal apoptosis in *Wdr11* mutants**



206 One possible explanation for the decreased number of PGCs is reduced proliferation. In  
207 mice, PGCs continue to proliferate during and after migration, rapidly expanding to a final  
208 population of ~25,000 cells per embryo at E13.5. Indeed, PGCs visibly divided during  
209 time-lapse imaging (see supplementary movies 1 and 2). To determine if loss of *Wdr11*  
210 affects PGC proliferation, we quantitatively assessed mitotically active cells by  
211 phosphorylated-histone H3 (PH3) staining of E10.5 GR (Fig 4A). The total number of  
212 PH3-positive and -negative PGCs and the mesenchymal somatic cells (GFP-negative,  
213 DAPI-positive) between the forelimb and hindlimb buds were manually counted and PH3-  
214 labelling index values generated. *Wdr11*<sup>-/-</sup> embryos showed a lower PH3 labelling index  
215 compared to WT in both PGCs and mesenchymal cells (Fig 4B). Therefore, *Wdr11* is  
216 required for the proliferation of both PGCs and mesenchymal cells in the migratory niche.

217  
218 During PGC migration, there is an up-regulation of factors involved in apoptosis, and  
219 embryos with a defective apoptotic pathway exhibited ectopic PGCs that were not cleared  
220 effectively (32). To determine further whether loss of *Wdr11* altered apoptosis, we carried  
221 out immunostaining for cleaved-Caspase 3 and manually counted Casp3-positive and -  
222 negative cells against total cell counts. The results indicated a significant increase of total  
223 apoptotic cells in *Wdr11* KO embryos. However, upon careful examination, we found that  
224 this was due to the abnormally elevated numbers of ectopic PGCs present in these  
225 embryos, rather than enhanced apoptosis in general. This conclusion was based on the  
226 fact that the apoptotic index in the mesenchymal somatic cells was not different between  
227 the genotypes and the ectopic PGCs were equally positive for Casp3 in both WT and  
228 *Wdr11* KO (Fig 4B). Therefore, loss of *Wdr11* did not result in an overall increase in cell  
229 death, confirming our observation from the time-lapse imaging (Fig 3B).

230

231

## 232 **PGC developmental signalling in Wdr11 mutants**

233 It is possible that the defective establishment of PGCs in embryos lacking Wdr11 simply  
234 reflects an overall retardation in development. To exclude such a notion, we validated  
235 the developmental stages of the embryos used in our analyses by morphological  
236 landmarks such as somite numbers, absence/presence of hind limbs and tail buds (E9.5  
237 and E10.5, respectively) and the closure of lens vesicle (E11.5), which indicated that  
238 mutant embryos did not have general developmental defects, at least during the period  
239 we studied.

240

241 We next examined whether Wdr11 KO affected the expression of genes known to play  
242 critical roles in the development of PGCs such as Blimp1, c-Kit, Steel (Kitl), Cxcr4 and  
243 Sdf1 (Cxcl12). Our initial screening confirmed the expression of these genes in the WT  
244 PGC migratory niche and adult urogenital organs (Fig 5A). Quantitative analyses by RT-  
245 qPCR indicated that Wdr11<sup>-/-</sup> embryos did not show significantly reduced mRNA levels  
246 of these regulators, except for a significant decrease in c-Kit (Fig 5B). There was also a  
247 numerical but non-significant reduction in Cxcr4. This is consistent with the reduced total  
248 number of PGCs in the mutants, as both c-Kit and Cxcr4 are cell surface receptors  
249 expressed by PGCs, while Cxcr4 is also more widely expressed (33;34). The expression  
250 of the respective ligands for these receptors, Steel and Sdf1, which mediate the chemo-  
251 attraction of PGCs towards the gonads, was not altered (Fig 5B). Therefore, the reduction  
252 in c-Kit alone seemed unlikely to explain the decreased proliferation of PGCs and  
253 mesenchymal somatic cells, nor the reduced PGC migration in Wdr11<sup>-/-</sup> embryos.

254

## 255 **Wdr11 KO disrupts primary cilia and canonical Hh signalling**

256 Previously we reported that Wdr11 is required for ciliogenesis and cells lacking Wdr11  
257 display short and infrequent primary cilia (12). Given the important role of primary cilia in

258 developmental signalling such as the Hh pathway, we hypothesised that the PGC  
259 deficiency in *Wdr11* KO mice may be due to disruption in cilia-dependent signalling in the  
260 GR regions. Notably, the pluripotent PGCs are naturally un-ciliated but remain  
261 responsive to Hh signalling (20). Immunofluorescence staining of GR sections for ciliary  
262 marker *Arl13b* confirmed that the mesenchymal cells immediately surrounding the PGCs  
263 were ubiquitously ciliated in WT (Fig 6A and C). The mesenchymal cells in *Wdr11* KO  
264 embryos, however, displayed significantly short and fewer cilia (Fig 6A and B). We have  
265 previously demonstrated that Hh signalling pathway genes are expressed in the PGC  
266 migratory niche in mice (20). Since Hh signalling is known to regulate proliferation of  
267 different cell types (35-37), we investigated if the reduced somatic cell proliferation in  
268 *Wdr11* mutants was linked to an attenuation of Hh signalling caused by defective cilia.  
269 We first examined the expression of *Ptch1* and *Gli1/2/3* in the PGC migration routes in  
270 WT embryos, which demonstrated a significant induction of these genes from E9.5,  
271 reaching a maximum at E10.5 followed by a gradual decrease till E12.5 (Fig 7A). These  
272 results suggest active canonical Hh signalling in this site and period. Our analyses of  
273 *Wdr11*-null GR, however, showed significantly diminished expression of these genes  
274 even at the E10.5 peak (Fig 7B), suggesting a severe defect in canonical Hh signalling in  
275 the absence of *Wdr11*. *Boc* is an obligatory co-receptor for *Ptch1* and mediates de-  
276 repression of *Smo* upon Hh ligand reception by *Ptch1* (19;20;38). We have previously  
277 shown that *Boc* is broadly expressed in the PGC migratory niche on both somatic cells  
278 and PGCs (20). When we assessed *Boc* expression in *Wdr11*-null GR, significant  
279 reductions in both mRNA (Fig 7C) and protein levels (Fig 8B) were observed. Therefore,  
280 general depression of the canonical Hh signalling involving insufficient expression of  
281 *Ptch1* and *Boc* may underlie the defective mesenchymal cell proliferation in *Wdr11* KO.

282

283

## 284 **Wdr11 KO affects non-canonical Hh signalling in PGCs**

285 Loss of primary cilia cannot explain the reduced growth and migration of PGCs in Wdr11  
286 KO because PGCs are naturally unciliated and can receive Hh signalling through cilia-  
287 independent mechanisms (20). Thus, additional mechanisms must be involved. We  
288 have recently shown that post-specification migration of PGCs, as observed at E9.5 -  
289 E11.5, may be mediated by non-canonical Hh signalling. Locally secreted low  
290 concentration of Hh was required for maintenance of the intrinsic motility of PGCs (20).  
291 Desert hedgehog (Dhh) has also been associated with genitourinary tract development  
292 (39). Our qRT-PCR data showed Dhh was indeed expressed in the PGC niche at a  
293 slightly higher level than Shh, although there was no significant changes of Dhh during  
294 E9.5 – E12.5 (Fig 7D). Therefore, we investigated if the expression of Shh or Dhh was  
295 altered in Wdr11-null GRs. Interestingly, Wdr11 KO did not affect the expression of either  
296 Dhh or Shh (Fig 7E). These data demonstrate that the reduced proliferation and motility  
297 of PGCs in Wdr11 KO was not due to a reduced expression of Hh ligands themselves. If  
298 so, it may be the accessibility or reception of Hh ligand that is defective in Wdr11 KO  
299 embryos, preventing the activation of downstream effector pathways.

300

301 It was reported that the Hh ligand is cooperatively received by Ptch2 and its co-receptor  
302 Gas1, exclusively expressed on PGCs (20). Upon stimulation with Hh ligand, the  
303 Ptch2/Gas1 hetero-complex mediated the rapid de-repression of Smo and induced non-  
304 canonical Hh signalling within minutes rather than days as required by the canonical Hh  
305 signalling associated with Gli transcription factors. This Ptch2/Gas1-dependent  
306 signalling did not require translocation of Smo to the primary cilium. Therefore, the  
307 unciliated PGCs could still respond to Hh ligands (20). To further define the role of Wdr11  
308 in this context, we investigated the status of these Hh receptors in WT and Wdr11-/-  
309 PGCs. Immunofluorescence analyses showed that Ptch2 and Gas1 expression was

310 virtually absent from Wdr11 KO PGCs (Fig 8A and B). Gas1 mRNA level was also  
311 markedly reduced (Fig 7C), indicating that Wdr11-defective PGCs may be unable to  
312 respond to Hh due to the lack of Hh receptors.

313

314 The nonreceptor tyrosine kinase Src is a regulator of cell motility and proliferation and  
315 was shown to be activated by phosphorylation in migrating PGCs via Ptch2/Gas1-  
316 dependent Hh signalling (20). Our immunofluorescence analyses of GR tissues using  
317 phospho-Src antibody demonstrated that Wdr11-null PGCs exhibited significantly  
318 reduced activation of Src (Fig 8 A and B). Therefore, defective expression of Ptch2/Gas1  
319 on the Wdr11-null PGCs led to a failed induction of downstream signalling effectors  
320 required for motility and proliferation such as p-Src. It has also been demonstrated that  
321 Ptch2/Gas1-dependent Hh signalling can elicit a global induction of cAMP signalling and  
322 phosphorylation of Creb in the cytoplasm, which is abolished in the absence of either  
323 Ptch2 or Gas1 (20). Since activation of Creb has a pivotal role in cell proliferation and  
324 motility (40) and agents that increase intracellular cAMP levels such as forskolin are  
325 shown to enhance PGC proliferation (41), we sought to determine if Wdr11-deficient  
326 PGCs failed to induce p-Creb in response to Hh. To this end, we generated primary  
327 cultures of GR tissues and stimulated them with recombinant Shh protein (Shh-N) for 10  
328 minutes, which was shown to induce p-Creb in PGCs but not in the somatic cells (20).  
329 Primary GR cultures which were serum starved for 24 hours exhibited very little basal p-  
330 Creb. Shh-N induced a significant upregulation of p-Creb in WT PGCs, which was  
331 markedly attenuated in Wdr11 KO PGCs (Fig 8C and D). Combined, these data support  
332 the notion that Ptch2/Gas1-dependent non-canonical Hh signalling involving Src and  
333 Creb is disrupted in Wdr11-null PGCs.

334

335

## 336 **Effects of Wdr11 mutations in mesenchymal cell proliferation**

337 In an attempt to directly confirm the role of Wdr11 in mesenchymal cell proliferation and  
338 to predict the consequences of disease-associated mutations of Wdr11, we employed  
339 NIH3T3 cells as a model and engineered a targeted KO of Wdr11 by CRISPR/Cas9-  
340 mediated gene editing. In addition, we also introduced two clinically identified missense  
341 mutations of WDR11, namely MT and RC variants. The MT mutation (c.1610C>T;  
342 p.Pro537Leu) was originally found in two brothers with delayed puberty and childhood  
343 obesity (12). The RC mutation (c.1783T>A; p.Trp595Arg) was found in a 61-year old  
344 male patient with high grade clear-cell renal cell carcinoma (42). We also generated a  
345 targeted KO of IFT88, a gene critically required for ciliogenesis, disruption of which is  
346 known to cause defective cilia formation and function (43). The specific mutations and  
347 targeted KO were confirmed by both Sanger sequencing of genomic DNA and Western  
348 blotting of the endogenous proteins (Fig 9A). These genetic manipulations of NIH3T3  
349 cells did not affect the gross cell morphology and the general cytoskeletal architecture  
350 (Fig 9B). However, when we examined the status of primary cilia, mutant cells showed  
351 a significant reduction in the cilia length compared to the WT (Fig 9C), except Wdr11-RC  
352 mutant which still maintained a comparable cilia length. Notably, ciliation frequency of  
353 Wdr11 mutants did not differ significantly from that of WT cells, while Ift88 KO caused a  
354 severe reduction in both cilia length and frequency (Fig 9C). We then asked whether  
355 these mutations altered cell proliferation by recording cell counts in normal growth  
356 medium over 3 days. Compared to the WT, cells with Wdr11 KO showed a severely  
357 attenuated growth, while those expressing Wdr11-MT and IFT88 KO showed a relatively  
358 moderate inhibition. Interestingly, the highest rate of proliferation was observed in  
359 Wdr11-RC mutant which had least affected cilia (Fig 10A), potentially implying pro-  
360 mitogenic effects associated with malignant cancers. The correlation between the  
361 proliferative capacity and the degree of cilia shortening suggests that cilia-dependent

362 canonical Hh signalling may regulate the proliferation of these cells. We speculate that  
363 a similar mechanism may underlie the reduced proliferation of somatic cells in the Wdr11-  
364 deficient GR exhibiting defective canonical Hh signalling (Fig 7).

365

### 366 **Effects of Wdr11 mutations in proliferation and motility of PGCs**

367 PGCs depend on the neighbouring somatic cells for survival and expansion (44-46). It is  
368 shown that isolated mouse PGCs can be cultured on feeder cell monolayer treated with  
369 Mitomycin-C (47). In such conditions, the feeder cells are not proliferating but  
370 physiologically alive, producing soluble factors and surface molecules necessary for  
371 stimulating PGC proliferation and motility while preventing apoptosis. To explore the  
372 consequences of Wdr11 mutations in the somatic cells which essentially govern the  
373 expansion and migration of PGCs, we established a PGC co-culture system where  
374 single-cell suspensions of GR tissues were seeded onto NIH3T3-CRISPR/Cas9 feeders  
375 expressing different mutations Wdr11 and Ift88. Growth curves of PGCs, generated by  
376 counting GFP-positive cells in the co-cultures over 48 hours period, indicated that the  
377 mutant feeders expressing Wdr11-MT, Wdr11 KO or Ift88 KO caused a significant  
378 reduction in PGC proliferation compared to the WT feeder (Fig 10B). On the contrary,  
379 Wdr11-RC feeder supported PGC proliferation almost as effectively as the WT feeder  
380 (Fig 10B). These results reinforce the notion that the property of somatic feeder cells can  
381 influence the growth of the PGCs.

382

383 Next, we investigated the impact of somatic mutations of Wdr11 on the motile capacity of  
384 PGCs. To this end, we analysed the random motility of isolated PGCs by time-lapse  
385 imaging of the co-cultures seeded on different feeders (Supplementary Movies 3-7).  
386 Analyses of the accumulated distance over 10 hours demonstrated that PGCs cultured  
387 on WT and Wdr11-RC mutant feeder maintained a similar level of intrinsic motility but



388 PGCs cultured on other mutant feeders had a significantly decreased motility (Fig 10C).  
389 This result also validates our slice culture experiment (Fig 3), confirming that the altered  
390 PGC migration in Wdr11-null embryo was not simply a consequence of morphological  
391 changes in the growing embryo, because even when the PGCs and their neighbouring  
392 somatic cells were dispersed and cultured as a monolayer in a dish, the effects of Wdr11  
393 mutant feeders on the PGC motility were clearly demonstrable. Therefore, defective cilia  
394 on feeder cells caused by loss-of-function mutations of Wdr11 or lft88 may have  
395 significant impacts on PGC proliferation and migration.

396

### 397 **Shh can rescue defective motility of PGCs**

398 We previously reported that treatment of Hh agonists (Purmorphamine or recombinant  
399 Shh-N) increased the motility of PGCs and CRISPR/Cas9-mediated deletion of Wdr11 in  
400 NIH3T3 cells abolished the accumulation of Shh in the conditioned medium (20). If so, it  
401 is possible that the reduced motility of PGCs cultured on Wdr11 KO feeders might be due  
402 to an insufficient supply of Hh ligand or Hh signalling molecules by the feeders. Therefore,  
403 we investigated if an addition of exogenous Hh ligand could rescue the reduced PGC  
404 motility on Wdr11 KO feeders. The motility of PGCs cultured on Wdr11 KO feeder was  
405 markedly lower than those cultured on WT feeders (Fig 10D). However, after Shh-N  
406 treatment, it was increased to a level comparable to that of WT feeders. This finding is  
407 in line with the idea that Wdr11-null cells with defective cilia may be unable to produce  
408 Hh signalling molecules required for PGC motility, which can be partly rescued by  
409 addition of exogenous Shh-N (Fig 10D). Combined, these results suggest that the loss  
410 of Wdr11 which disrupts the function of primary cilia on the somatic cells affects the  
411 behaviour of PGCs, potentially due to a failed provision of Hh ligand necessary to induce  
412 the non-canonical signalling required for the migration and proliferation of PGCs.

413



414 **DISCUSSION**

415

416 PGCs migrate independently of one another mainly guided by their interaction with the  
417 environment. PGCs also express markers typical of embryonic stem cells including  
418 OCT4, NANOG and SOX2 (48). The fact that PGCs and their surrounding somatic cells  
419 originated from different niches and the unique property of PGCs naturally lacking primary  
420 cilia makes a fascinating model system where cilia-dependent and -independent Hh  
421 signalling pathways concurrently regulate cell behaviour in different context. We propose  
422 that canonical and non-canonical Hh signalling are differentially involved in the  
423 development of somatic and germ cell components of the gonads, and both pathways  
424 are each required, in parallel, for normal PGC development. How PGCs receive and  
425 interpret these different signals is not fully understood yet, but paracrine secretion or  
426 delivery of the Hh signalling component from the primary cilia may be involved. Although  
427 we did not specifically address this question in current paper, shedding of ciliary tips or  
428 release of ectosomes containing Hh signalling molecules, synchronised with cell cycle,  
429 has been reported (49-51). Using the PGC co-culture system, we demonstrated that  
430 primary cilia are not only important for the growth of soma itself but also critical for the  
431 proliferation and migration of PGCs growing on them. The fact that *Ift88* KO feeder also  
432 showed a significant impairment in supporting PGCs suggests that it is not just a specific  
433 effect by *Wdr11*, but may be applicable to other ciliopathy genes. We also established  
434 the genotype-phenotype correlations of clinically identified mutations of *Wdr11*, providing  
435 new insights for the pathogenesis of *Wdr11*-associated disorders such as CHH/KS  
436 (potential loss of function) and renal carcinomas (potential gain of function).

437

438 Defective migration and proliferation of PGCs in *Wdr11* mutants cannot simply be a  
439 secondary manifestation of primary cilia defects leading to a multitude of developmental

440 signalling failures, because we found that other key regulators of PGCs were not severely  
441 affected by *Wdr11* KO (Fig 5). We have recently shown that the local Hh signalling is  
442 required for the migration of post-specification PGCs. Treatment with recombinant Shh  
443 or a Smo agonist could enhance PGCs' intrinsic motility, while Hh antagonists such as  
444 cyclopamine and vismodegib inhibited it without affecting directionality (20). The  
445 unciliated PGCs rely on *Ptch2*/*Gas1*-dependent non-canonical Hh signalling pathway  
446 mediated by p-Src and p-Creb. Conversely, *Ptch1*/*Boc*-dependent canonical Hh  
447 signalling is likely responsible for the maintenance of the surrounding mesenchymal cell  
448 proliferation via Gli transcription factors. Our study provides further evidence for the  
449 requirement of these signalling pathways in PGC development, which is disrupted by  
450 *Wdr11* KO.

451

452 At least two lines of evidence suggest that the migrations of developing GnRH neurones  
453 and PGCs are linked or mediated by common signalling pathways. First, chemokine  
454 SDF-1 and its receptor CXCR4, which have an established role in directed migration of  
455 PGCs, can also regulate GnRH neuronal migration (18). SDF-1 is expressed in the nasal  
456 mesenchyme, whereas CXCR4 is localised in migrating GnRH neurons and  
457 olfactory/vomer nasal nerve axons. *Cxcr4*-deficient mice contained significantly  
458 decreased numbers of GnRH neurones accompanied by defective migration. Secondly,  
459 Fibroblast Growth Factor (FGF) signalling pathway, a well-established KS/CHH-  
460 associated signalling pathway involving genes such as *FGFR1*, *FGF8* and Heparan  
461 sulfate 6-O-sulfotransferase 1 (52-54), is also important in development of PGCs (55).  
462 PGCs express two FGF receptors, *FGFR1-IIIc* and *FGFR2-IIIb*. FGF2, the ligand for  
463 *FGFR1-IIIc*, modulates PGC motility whereas FGF7, the ligand for *FGFR2-IIIb*, affects  
464 PGC proliferation (55). Importantly, FGFRs are also shown to localise to primary cilia,  
465 affecting the length and function of primary cilia (56). Loss of *FGFR1* or its FGF ligands

466 resulted in shorter cilia in zebrafish and *Xenopus* (57). Based on these findings we  
467 speculate that KS/CHH might be a ciliopathy. KS/CHH are traditionally considered as a  
468 'secondary' hypogonadism caused by defective development and function of GnRH  
469 neurones. Our data suggest that 'primary' hypogonadism (defects within the gonads) may  
470 also contribute. In a study, 26% of KS/CHH male patients did not respond to GnRH  
471 therapy (i.e. normalisation of testosterone levels, testes volume and spermatogenesis),  
472 suggesting that primary testicular defects may be involved (4). Nonetheless, these  
473 atypical responders were still considered as secondary (i.e. hypo-gonadotrophic)  
474 hypogonadism because GnRH administration could still increase LH/FSH levels. So far,  
475 up to 56 genes are reported to be associated with KS/CHH. Many of these genes are  
476 broadly expressed in the HPG axis; thus, the impact of the mutations may not be limited  
477 to hypothalamic GnRH neurons but produce more than one primary defect within the  
478 HPG axis. Those KS/CHH patients who do not respond to gonadotrophin therapies may  
479 suggest the possibility of primary hypogonadism, resulting from being born with  
480 significantly reduced numbers of germ cells. Investigation of the effects of other KS/CHH-  
481 associated genes in PGC migration may provide further evidence.

482

483 Here we report a previously undescribed role for *Wdr11* in development of the germ line  
484 with direct consequences in PGC development. Loss of *Wdr11* resulted in defective cilia  
485 and disrupted GnRH neuronal migration in mouse and zebrafish in vivo. ShRNA-  
486 mediated knockdown of WDR11 in human GnRH neuronal cells caused defective cilia,  
487 which was partially rescued by Hh agonist in vitro (12). Several members of the WDR  
488 protein family have been shown to play important roles in ciliogenesis. WDR11 is a multi-  
489 functional adaptor protein involved in cargo trafficking to the trans-Golgi network (58).  
490 Other studies have implicated WDR11 as a part of adaptor complexes regulating  
491 ciliogenesis (59) and autophagy (60). We speculate that WDR11 is involved in the

492 assembly and reabsorption of the primary cilium via endosome trafficking and targeted  
493 protein degradation at the ciliary base. The clinically identified mutations of WDR11 are  
494 mostly found on the surface of the protein, thus are likely to interfere with the interactions  
495 of other binding partners (7).

496

497 Hypogonadotropic hypogonadism and infertility with or without anosmia are part of the  
498 clinical features of ciliopathies such as Bardet-Biedl syndrome (61), but in most cases,  
499 ciliopathy-related infertility was considered to be caused by the motile cilia defects  
500 affecting sperm flagella and oviduct epithelium. Our data show that non-motile primary  
501 cilium-dependent mechanisms also play an important role. Primary cilia-dependent Hh  
502 signalling is required for the proliferation and migration of PGCs that populate the foetal  
503 gonads, the lack of which could account for the germ cell insufficiency at birth, potentially  
504 leading to subfertility or infertility. Although several genes ensuring proper development  
505 of germ cells have been identified (14), the link with KS/CHH has not been established.  
506 KS/CHH patients show small testes and ovarian insufficiency, raising the possibility that  
507 normal gametogenesis might be still possible with the remaining germ cells, since loss of  
508 *Wdr11* does not appear to affect the specification or fate determination of PGCs.  
509 Understanding the role of *Wdr11* in later stages of reproductive development including  
510 gonadogenesis and steroidogenic cell differentiation will require further studies.

511

## 512 **MATERIALS AND METHODS**

513

### 514 **Breeding of transgenic mice**

515 *Stella<sup>GFP</sup>* mice were originally obtained from Azim Surani (Gurdon Institute) (31) and  
516 maintained in a C57BL/6 background as described (20). The *Wdr11* knockout mouse  
517 (International Gene Trap Consortium Ayu21-KBW205) was generated at the Institute of

518 Resource Development and Analysis, Kumamoto University in Japan (12). To establish  
519 the *Stella*<sup>GFP+/-</sup>;*Wdr11*<sup>+/-</sup> hybrid line, the homozygote *Stella*<sup>GFP</sup> mice were crossed with  
520 the heterozygote *Wdr11* mice. The noon copulation plug was counted as embryonic day  
521 0.5 after timed mating. All experiments were conducted in accordance with the Animals  
522 (Scientific Procedures) Act 1986 in the Biological Research Facility at St. George's,  
523 University of London (PPL 70/8512) according to approved institutional guidelines and  
524 protocols.

525

### 526 **Mouse genotyping**

527 The genotypes of the parent mice and their litters were verified by performing PCR and  
528 qPCR analyses of the genomic DNA. The copy number of the GFP allele was determined  
529 quantitatively by qPCR to confirm the genotypes. To perform the relative quantification,  
530 the crossing point (Cp) value of the target gene (*GFP*) was normalised to the Cp of the  
531 reference gene (*β-tubulin*), based on which the Relative Copy Number Ratios (RCNR)  
532 were generated. Copy Number Variation (CNV) was calculated by  $CNV =$   
533  $\frac{1}{baseline\ RCNR} \times Targeted\ gene\ RCNR$ . The rounded CNV value of 1 was considered to  
534 indicate a heterozygote and 2 a homozygote. A CNV value of 0 indicated a WT mouse  
535 (i.e. no GFP). The presence of the *Stella*<sup>GFP</sup> allele was further confirmed by test-breeding  
536 of randomly selected homozygous litters with WT mice, followed by PCR amplification of  
537 GFP. Primers used for genotyping analyses are shown in Supplementary Information.

538

### 539 **qPCR and RT-PCR**

540 For RT-PCR analyses, mouse tissues were harvested and homogenized before total  
541 RNA was extracted using an RNeasy Mini Kit according to the manufacturer's protocol.  
542 First-strand complementary DNA (cDNA) was synthesized using oligo(dT) primers and  
543 the Precision nanoScript2 Reverse Transcription Kit (Primer Design). Quantitative real-

544 time PCR was performed using the Maxima® SYBR green qPCR master mix (Thermo  
545 Fisher Scientific) in a Light Cycler 2.0 instrument (Roche). The crossing point (Cp) values  
546 were obtained by LightCycler® Version 4.1 software (Roche). Cp values were analysed  
547 using the  $2^{-\Delta\Delta CT}$  method normalised to *Gapdh*. All primers used are provided in  
548 Supplementary Information.

549

## 550 **Immunohistochemistry**

551 Embryos were fixed in 4% paraformaldehyde prior to paraffin embedding. Sections cut at  
552 6  $\mu\text{m}$  thickness were de-paraffinised with HistoClear (National Diagnostics) and  
553 rehydrated in PBS. For  $\beta$ -galactosidase detection, whole-mount embryos were fixed with  
554 X-gal Fix buffer (0.2% glutaraldehyde, 2% paraformaldehyde, 5mM EGTA, 2mM  $\text{MgCl}_2$   
555 in PBS pH 7.4) for 1 hr at 4°C, washed in PBS and then incubated overnight at 37°C in  
556 X-gal solution (1mg/ml X-gal, 2mM  $\text{MgCl}_2$ , 5mM  $\text{K}_3\text{Fe}(\text{CN})_6$  in PBS at pH 7.4). After  
557 washing in PBS and paraffin-embedding, samples were sectioned at 12 $\mu\text{m}$ -thickness and  
558 counterstained with eosin. For alkaline phosphatase (ALP) staining, embryo sections  
559 were stained with BCIP-NBT (Roche) in ALP buffer at 4°C. Images of embryo sections  
560 were analysed by Zeiss Axioplan 2 Upright.

561

## 562 **Immunofluorescence**

563 Serial sections of dissected embryos at 5-7 $\mu\text{m}$  thickness were deparaffinized, rehydrated  
564 and washed in PBS. Following antigen retrieval in sodium citrate buffer (10 mM sodium  
565 citrate, 0.05% Tween 20, pH 6.0), sections were blocked with 10% goat serum in 0.5%  
566 Triton-X PBS for 1 hour at room temperature and then incubated overnight at 4 °C with  
567 primary antibodies diluted in 10% goat serum in 0.5% Tween in PBS. After washing,  
568 samples were incubated with fluorescence-labelled secondary antibodies at 1:500  
569 dilution and counterstained with DAPI before mounting in Mowiol. For

570 immunofluorescence analyses of cultured cells, cells were plated on glass coverslips,  
571 fixed with 4% PFA, permeabilized with 0.2% Triton X-100 in PBS, and incubated in  
572 blocking buffer (2% heat-inactivated goat serum, 0.2% Triton X-100 in PBS) before  
573 probing with primary antibodies diluted in blocking buffer. After washing, secondary  
574 antibodies were added along with DAPI. Fluorescence microscopy was performed using  
575 a Zeiss Axiovert 200M Upright microscope and analysed by ImageJ software  
576 (<http://rsbweb.nih.gov/ij/>).

577

### 578 **Imaging of primary cilia and F-actin**

579 Cultured cells on glass cover slips were serum-starved for 18-24 hours before fixing to  
580 induce ciliogenesis. Embryo sections were prepared as above. Samples were analysed  
581 by immunofluorescence staining with anti-Arl13B antibody that visualises the cilia  
582 axoneme or anti-gamma-tubulin antibody that visualises the basal body. To generate  
583 ciliation frequency values, the total number of cilia and nuclei were counted from the  
584 maximum intensity projection images of each channel manually. The length of cilia was  
585 assessed in random fields of cells after Arl13b staining by measuring the maximum  
586 projection using ImageJ. To generate the 3D imaging of GR section, 3D volume  
587 rendering of the image stacks was performed in ImageJ software using the volume viewer  
588 plugin. For F-actin staining, Alexa Fluor 488-conjugated phalloidin (Invitrogen,  
589 LSA12379) was used.

590

### 591 **Embryo slice culture and live imaging**

592 Embryo slice organ culture and filming was performed as previously described (20).  
593 Briefly, transverse sections of E10.5 embryos were cultured in HEPES-buffered DMEM/F-  
594 12 medium with 0.04% lipid-free BSA and 100U/ml penicillin/streptomycin. A single  
595 optical section was captured every 15 min for approximately 10 hrs (total 40 frames). The



596 z-stack images were extracted as TIFF files and one stack per time interval was put  
597 together using ImageJ to create a movie. Motile behaviour of PGCs was evaluated based  
598 on accumulated distance (total cell path travelled), Euclidean distance (the shortest  
599 distance between cell start and end points), cell velocity and directionality (the ratio  
600 between Euclidean distance and accumulated distance indicating the straightness of the  
601 migration path), using the Chemotaxis and Migration Tool 2.0 plug-in software (Ibidi  
602 GmbH). Velocity measurements were generated for each time interval by using the  
603 formula  $V = [\text{sqrt}(dx^2 + dy^2)](p)/0.25h$ , where dx is the change in the x-axis, dy is the  
604 change in the y-axis, and p is the pixel size in  $\mu\text{m}$ . The velocities of all the tracked cells  
605 were averaged to obtain an overall mean velocity for each embryo slice/movie. Tracking  
606 was performed only on those PGCs that remained in focus and viable for the entire  
607 duration of filming. Ectopic PGCs localised in the mesentery and hindgut were not  
608 analysed as they tend to disintegrate during filming.

609

### 610 **Genital ridge primary culture and live imaging**

611 Dissected GR tissues of E10.5 embryos were digested in 0.25% trypsin, passed through  
612 a  $0.4\mu\text{m}$  cell strainer and suspended in DMEM/L-15 medium supplemented with 20%  
613 knockout serum replacement (Invitrogen), 2mM L-glutamine, 0.1mM non-essential amino  
614 acids and 0.1mM 2-mercaptoethanol (Sigma-Aldrich), before being plated onto 0.1%  
615 gelatin-coated cover slips. Cells were incubated in 0.5% serum-containing media before  
616 treatment with 200 ng/mL recombinant Shh N-terminal peptide (R&D Systems, 1314-SH)  
617 diluted in dimethyl formamide (DMF).

618 For PGC co-cultures with feeder layers, single cell suspensions generated from dissected  
619 GR tissues were plated onto the NIH3T3 feeder layer pre-treated with Mitomycin-C  
620 ( $5\mu\text{g/ml}$ ). Motile behaviors of PGCs were measured by time-lapse imaging of GFP-  
621 positive cells captured every 15 minutes for 10 hours. Live imaging was performed using



622 Nikon A1R laser scanning confocal microscope in a humidified 5% CO<sub>2</sub> chamber at  
623 37.0±0.5°C. Random motility of PGC was analyzed using the Chemotaxis and Migration  
624 Tool 2.0 plug-in software (Ibidi GmbH).

625

### 626 **NIH3T3 cell culture and CRISPR/Cas9**

627 NIH 3T3 cells (American Type Culture Collection, Manassas, VA) were routinely cultured  
628 in DMEM with 2mM L-glutamine and 100µg/ml penicillin/streptomycin (Sigma-Aldrich),  
629 supplemented with 10% newborn calf serum (NCS). For growth curve analyses, NIH3T3  
630 cells were plated at 2x10<sup>6</sup> cells per 10 cm dish in the growth medium and total cell counts  
631 were assessed every 12 hours. NIH3T3 cells with targeted editing of Wdr11 and IFT88  
632 were generated using CRISPR/Cas9 approach. Briefly, sgRNAs designed using the  
633 CRISPR Design Tool (<http://crispr.mit.edu>) were cloned into pSpCas9(BB)-2A-Puro  
634 (Addgene #48139) and transfected using Polyfect (Promega). To isolate single-cell  
635 clones, transfected cells were plated in 96-well plates. After selection in puromycin  
636 (Cambridge Bioscience), positive clones were confirmed by Sanger sequencing and  
637 western blot. The sequences of the sgRNA and primers used are provided in  
638 Supplementary Information.

639

### 640 **Apoptosis and proliferation analyses**

641 SSEA1-positive PGCs with co-localised staining of phosphohistone-H3 and cleaved  
642 caspase-3 were counted from every other sections of the entire length of the gonadal  
643 ridge of E10.5 embryos from each genotype. DAPI was used to determine the total  
644 number of cells. DAPI-positive cells negative for SSEA1 were counted as somatic cells.  
645 The PGC growth curves were generated by counting GFP-positive cells from 10 random  
646 fields of GR primary cultures plated on NIH3T3 feeder layer at 0, 9, 18, 24, 32 and 48  
647 hours after plating. The percentage fold was calculated from the total cell count at 0 hours.

648 The images were captured using an Olympus IX70 inverted microscope (Hamamatsu  
649 C4742–95, Hamamatsu, Japan).

650

### 651 **Western blot**

652 Total protein extracted in a lysis buffer (50mM HEPES, 150mM NaCl, 10% glycerol, 1%  
653 Nonidet P-40, and 1mM EDTA) containing protease/phosphatase inhibitors (Sigma-  
654 Aldrich) was separated by SDS-PAGE and transferred onto Hybond-ECL membrane  
655 (Amersham) before being probed with primary antibodies diluted in blocking buffer (5%  
656 skim milk in TBS with 0.05% Tween 20 (TBST)). After washing in TBST, membrane was  
657 incubated with horseradish peroxidase-conjugated secondary antibodies before analyses  
658 by enhanced chemiluminescence (GE Healthcare). B-Actin was used as loading control.

659

### 660 **Antibodies**

661 Primary antibodies used were against GFP (Rabbit IgG, 1:200, Abcam, ab290), SSEA1  
662 (Mouse IgG, 1:200, Developmental Studies Hybridoma Bank, MC-480), Stella (Rabbit  
663 IgG, 1:200, Abcam, ab19878), phospho-histone H3 (Rabbit IgG, 1:500, Millipore, 06-570),  
664 cleaved-caspase 3 (Rabbit IgG, 1:200, Cell Signalling, 9661), Arl13B (Rabbit IgG, 1:1000,  
665 Proteintech, 17711-1-AP), gamma-tubulin (mouse IgG, 1:1000, Sigma T6557), phospho-  
666 Src (Rabbit IgG, 1:200, Invitrogen, 44-660G), phospho-Creb (Rabbit IgG, 1:200, Cell  
667 Signaling, 9198), Wdr11 (rabbit IgG, 1:100, Abcam, ab175256; goat IgG, 1:100, Santa  
668 Cruz, sc-163523), IFT88 (rabbit IgG, 1:500, Proteintech, 13967-1-AP) and b-actin (rabbit  
669 IgG, 1:500, CST, 4967L). Secondary antibodies, all of which were from Invitrogen  
670 Thermo Fisher Scientific and used at 1:5000 dilution, include Alexa Fluor 488 (Goat anti-  
671 rabbit, A-11008), Alexa Fluor 555 (Goat anti-mouse, A-21422), Alexa Fluor 568 (Goat  
672 anti-rabbit, A-11011), Alexa Fluor 555 (Goat anti-rabbit, A-27039) and Alexa Fluor 488  
673 (Donkey anti-goat, A-11055).

674

## 675 **Statistical analyses**

676 Statistical analyses were performed using GraphPad Prism 5 (La Jolla, CA, USA). The  
677 numbers of independent replicated experiments (n) are indicated in the relevant figure  
678 legends where possible. In some experiments where percentage values are indicated,  
679 the values were calculated from the average raw data value of the sample divided by the  
680 average raw data value of the control. Significance was tested using an unpaired  
681 student's t-test. In experiments where the number of repeated measures was unequal  
682 per group, a one-way analysis of variance (ANOVA) was used with Welch's test.

683

## 684 **Acknowledgements**

685 YJK, JYL and S-HK were supported by Medical Research Council (MRC) grant  
686 MR/L020378/1 awarded to S-HK and LCL. JYL and YJK were also supported by St  
687 George's Research Bridging Fund Scheme and Global Educational Trust awarded to S-  
688 HK. We thank Chris Wylie for his generous help and advice with the embryo slice culture.  
689 We appreciate Gregory Perry for technical assistance with confocal microscopy live  
690 imaging.

691

## 692 **Author contributions**

693 Conceptualization: S-HK, LCL, H-GK; Funding acquisition: S-HK, LCL; Supervision: S-  
694 HK, NAB, DB; Methodology (creation of models and design of methods): YJK, JYL, S-  
695 HK, D-WK, PA; Investigation (performing the experiments): YJK, JYL; Original draft  
696 writing: S-HK; Manuscript review and editing: YJK, JYL, H-GK, D-WK, DCB, NAB, LCL  
697 and S-HK.

698

## 699 **Competing interests**

700 The authors declare no competing interests.

701

## 702 **FIGURE LEGENDS**

703

### 704 **Figure 1. Wdr11 is expressed in embryonic urogenital tissues and PGCs.**

705 **(A)** Expression of Wdr11 and Gapdh in the hindgut (HG) at E9.5, the urogenital ridge  
706 area (UG) at E10.5 - 11.5 and the post-pubertal reproductive organs (testis, epididymis,  
707 ovary) and kidney in 8-week-old mice was assessed by RT-PCR. Representative results  
708 are shown from 3 independent biological samples.

709 **(B)** Genotyping analyses of Wdr11 knockout mice by PCR. The WT and gene-trap allele  
710 are indicated (left panel). The presence of the GFP-specific allele in the *Stella<sup>GFP</sup>;Wdr11*  
711 hybrid line was confirmed by PCR (right panel) as well as by a test breeding (see  
712 Materials and Methods).

713 **(C)** Images of transverse sections of whole-mount X-gal-stained paraffin-embedded  
714 E10.5 embryos with eosin counterstaining. WT (+/+) and heterozygous (+/-) embryos are  
715 shown (scale bar, 100µm). n, neural tube; ao, aorta; nc, notochord; mt, mesonephric  
716 tubules; hg, hindgut.

717 **(D)** Immunofluorescence staining of WDR11 (green) and DAPI (blue) on the transverse  
718 sections of Wdr11 WT and KO embryos at E10.5. Scale bar represents 100µm.

719 **(E)** Transverse sections of E10.5 *Wdr11* WT and KO embryos stained with anti-WDR11  
720 (green), anti-SSEA1 (red) and DAPI (blue), confirming expression of Wdr11 in PGCs  
721 (SSEA1-positive) and the surrounding somatic cells in the GR area. A zoomed-in image  
722 of the dotted area is shown. Scale bar represents 20µm.

723

### 724 **Figure 2. Wdr11 KO causes a reduction in total PGCs with increased ectopic PGCs.**

725 **(A)** Immunofluorescence (left) and alkaline phosphatase (right) staining analyses of  
726 PGCs in their migratory route from hindgut towards the GRs (yellow outlines) at different  
727 developmental stages as indicated. Compared to the WT, *Wdr11*<sup>-/-</sup> embryos contain  
728 fewer PGCs in the GRs, and more ectopically located PGCs (red arrowheads). n, neural  
729 tube; ao, aorta; hg, hindgut; me, mesentery. Scale bar, (E9.5) 20µm; 100µm (E10.5,  
730 E11.5).

731 **(B)** *Wdr11* KO embryos show a reduction in total PGC numbers. Total PGCs were  
732 counted from every other slide of the serial sections of E9.5, E10.5 and E11.5 embryos  
733 (n=5 per genotype). Total count per embryo is shown as mean ± SD.

734 **(C)** *Wdr11* KO embryos contain an increased number of ectopic PGCs. Total number of  
735 PGC population in each location at E10.5 are shown for each genotype (n=5). hg, hindgut;  
736 mes, mesentery; gr, genital ridge.

737 **(D)** The proportion of ectopic PGCs present in WT and KO embryos (n=5 per genotype)  
738 at E10.5 is shown as a percentage value of total PGCs. Error bars represent SD.  
739 Unpaired Student's t-test (\*P < 0.05; \*\*P < 0.01; \*\*\*P < 0.001; \*\*\*\*P < 0.0001).

740

### 741 **Figure 3. Loss of *Wdr11* disrupts PGC migration.**

742 **(A)** Time-lapse images of embryo slice cultures from *Stella*<sup>GFP</sup>;*Wdr11* hybrid mice.  
743 Representative images of a plane of the z-stack at 0, 5 and 10 hours are shown from  
744 movies of E10.5 *Stella*<sup>GFP+/+;</sup>*Wdr11*<sup>+/+</sup> and *Stella*<sup>GFP+/+;</sup>*Wdr1*<sup>-/-</sup> embryos in biologically  
745 independent experiments (Supplementary Movies 1 and 2). n, neural tube; a, aorta; hg;  
746 hindgut. Scale bar represents 100µm. The PGCs (GFP-positive) migrating towards the  
747 GRs (indicated in red) were tracked using ImageJ. Trajectory plots of migration (right  
748 panel) were generated by placing the starting points of individual PGC tracks onto the  
749 same point. Origins of all tracks were centred at the 0,0 XY coordinate with distance in

750 micrometers on x- and y-axes. The direction of migration in relevance to the embryo  
751 orientation is shown with dotted lines. Dor, dorsal; lat, lateral; vent, ventral.

752 **(B)** Comparison of the velocity (total accumulated distance over time period),  
753 accumulated distance (total path travelled) and Euclidean distance (the shortest distance  
754 between the start and end points) indicates a significant reduction in PGC migration in  
755 *Wdr11*-null embryos compared to WT. There was no significant difference between the  
756 two genotypes in the directionality of migration (the straightness of the migration path,  
757 represented by the ratio between Euclidean distance and accumulated distance) or cell  
758 survival (assessed by the number of hours that the GFP fluorescence from a cell was  
759 detected during the imaging shown in A). Error bars represents SEM. Data were from  
760 independent slice cultures (WT, n=9; KO, n=6) where 7-10 PGCs were tracked from each  
761 embryo slice. Statistical analysis by unpaired Student's t-test (\* $P < 0.05$ ; \*\*\*\* $P < 0.0001$ ;  
762 directionality,  $P = 0.061$ ; survival,  $P = 0.64$ ).

763

764 **Figure 4. *Wdr11* KO affects PGC proliferation but not directly their survival.**

765 **(A)** Representative images of immunofluorescence staining of SSEA1 (red) and  
766 phospho-histone H3 (PH3, green) on *Wdr11* WT and KO embryos at E10.5. Yellow line  
767 indicates the GRs. Zoomed-in images of the dotted area are shown on the right. ao, aorta;  
768 hg, hindgut; me, mesentery. Scale bar, 100 $\mu$ m (left); 20 $\mu$ m(right).

769 **(B)** Analyses of cell proliferation based on the PH3-positive cell counts. The percentage  
770 values are obtained by manually counting the total positive cells against the total cell  
771 counts labelled with DAPI from every other section of the PGC migratory route (top panel).  
772 The percentage of PH3-positive cells in the somatic cell population (middle panel) and  
773 the PGC population (bottom panel) are compared between WT and KO embryos. Error  
774 bars represent SEM. Statistical analysis by unpaired Student's t-test (n=5, number of  
775 embryos for each genotype; \* $P < 0.05$ ; \*\* $P < 0.01$ ).

776 **(C)** Representative images of immunofluorescence staining of SSEA1 (red) and  
777 Caspase-3 (green) on E10.5 Wdr11 WT and KO embryos. Yellow line indicates the GRs.  
778 Scale bar, 100 $\mu$ m.

779 **(D)** Analyses of apoptosis based on Caspase-3 immunofluorescence. CASP3-positive  
780 and total cells were counted from every other section of the PGC migratory route (top  
781 left). The percentages of CASP3-positive somatic cells (top right), PGCs (bottom left)  
782 and ectopic PGCs (bottom right) are compared between WT and KO embryos. Error  
783 bars represent SEM. Statistical analysis by unpaired Student's t-test (n=5, number of  
784 embryos for each genotype; \*\*\*P<0.001).).

785

786 **Figure 5. Wdr11 KO did not affect the expression of key genes required for the PGC**  
787 **migration and urogenital development.**

788 **(A)** RT-PCR analysis of Blimp1, c-Kit, Steel, Cxcr4 and Sdf1 mRNA in the PGC migratory  
789 niche of E9.5, E10.5 and E11.5 embryos (HG, hindgut; UG, urogenital ridge) and the  
790 reproductive organs and kidney in adults. NC, no template control.

791 **(B)** Comparison of gene expression in WT and Wdr11 KO by qRT-PCR. Loss of Wdr11  
792 did not affect expression of these genes in the PGC migratory niche area, except c-kit  
793 showed a decrease. Values are shown as means  $\pm$  SD. Statistical analysis by unpaired  
794 Student's t-test (n=5 embryos for each genotype; \*\*P < 0.01).

795

796 **Figure 6. Primary cilia are disrupted in the Wdr11 KO PGC migratory niche**

797 **(A)** Immunofluorescence analyses of primary cilia by anti-ARL13B (green) and anti-  
798 SSEA1 (red) staining on GR tissue sections of Wdr11 WT and KO embryos at E10.5.  
799 Zoomed-in images of the dotted area are shown on the right. Scale bar, 10  $\mu$ m (left panels)  
800 and 50  $\mu$ m (right panels). Representative images are shown from 5 independent  
801 biological samples.



802 **(B)** Comparison of the ciliation frequency and cilium length observed in GR sections.  
803 Ciliation frequency values are generated from the total number of cilia and nuclei counted  
804 from the maximum intensity projection images of each channel manually. The length of  
805 cilia was assessed by measuring the maximum projection of Arl13b signal using ImageJ.  
806 WT (n=119) and KO (n=103). Unpaired t-test. \*\*\*P < 0.001.

807 **(C)** 3D reconstruction of GR region in E10.5 WT embryo stained with anti-Arl13B and  
808 anti-SSEA1. ImageJ software using the volume viewer plugin was used to build the image  
809 stacks. Scale bar, 10  $\mu$ m.

810

811 **Figure 7. Expression of Hh pathway genes in the PGC migratory niche is disrupted**  
812 **by Wdr11 KO**

813 **(A)** Expression of Ptch1, Gli1, Gli2 and Gli3 in the PGC migratory niche was assessed  
814 by RT-qPCR of WT mouse embryos at E9.5, E10.5, E11.5 and E12.5. Data were  
815 normalised to Gapdh. Means  $\pm$  SD are shown. Statistical analysis by multiple t-test  
816 (number of embryos for each stage, n=5). \*P < 0.01, \*\*P < 0.001; \*\*\*P < 0.0001; \*\*\*\*\*P <  
817 0.000001.

818 **(B)** Expression levels of Ptch1, Gli1, Gli2 and Gli3 are significantly reduced in the GR  
819 area of Wdr11-deficient embryos compared to WT litter mates at E10.5. Means  $\pm$  SD are  
820 shown. Statistical analysis by multiple t-test (number of embryos for each genotype, n=5);  
821 \*\*P = 0.003730; \*\*\*P = 0.000045; \*\*\*\*\*P < 0.000001).

822 **(C)** Expression of Boc and Gas1 are significantly reduced in the GR area of Wdr11-  
823 deficient embryos compared to WT litter mates at E10.5. Means  $\pm$  SD are shown.  
824 Statistical analysis by multiple t-test (n=5, number of embryos for each genotype; \*\*P =  
825 0.003730; \*\*\*P = 0.000045; \*\*\*\*\*P < 0.000001).

826 **(D)** Dhh mRNA levels did not show statistically significant difference in GRs of E9.5 – E  
827 12.5 embryos (Welch's ANOVA test).



828 **(E)** mRNA levels of Dhh and Shh in the GRs at E10.5 was not altered by loss of Wdr11  
829 (P = 0.76; P = 0.29 respectively).

830

831 **Figure 8. Loss of Hh receptors and p-Src in Wdr11-deficient PGCs.**

832 **(A)** Immunofluorescence analyses of Ptch2, Gas1, Boc and p-Src on the GR sections of  
833 WT and Wdr11 KO embryos at E10.5. PGCs are labelled by SSEA1 staining. The  
834 merged images are shown without DAPI signal to improve the clarity. Scale bar, 10µm.

835 **(B)** The relative fluorescence intensity values of Ptch2, Gas1, Boc and p-Src, that were  
836 normalised with the fluorescence intensity values of SSEA1 in each cell. Data are  
837 obtained from WT (n=8), KO (n=10) for Ptch2; WT (n=10), KO (n=12) for Gas1; WT (n=9),  
838 KO (n=11) for Boc; WT (n=11), KO (n=12) for p-Src. Error bars represent means ± SD.  
839 Statistical analysis by unpaired t-test with Welch's correction. \*\*\*\*P < 0.0001.

840 **(C)** PGCs in the GR primary cultures generated from E10.5 embryos of WT and Wdr11  
841 KO were analysed after immunofluorescence co-staining of p-Creb and SSEA1. Cells  
842 plated on 0.1% gelatin-coated cover slips were treated with solvent dimethyl formamide  
843 (DMF) or recombinant Shh protein (Shh-N) for 10 minutes. Representative images are  
844 shown. Scale bar, 10µm.

845 **(D)** The relative fluorescence intensity values of p-Creb normalized with the intensity  
846 values of SSEA1 observed in each PGC were compared in each of the genotype group,  
847 with or without Shh-N treatment for 10 minutes. Data are obtained from DMF (n=8) and  
848 Shh-N (n=9) for WT; DMF (n=9) and Shh-N (n=9) for Wdr11 KO. Error bars represent  
849 means ± SD. Statistical analysis by unpaired t-test with Welch's correction. \*\*\*\*P <  
850 0.0001.

851

852 **Figure 9. Characterisation of NIH3T3 cells after CRISPR/Cas9-mediated**  
853 **mutagenesis.**

854 **(A)** Western blot analyses of NIH3T3 cells with targeted gene editing confirmed the  
855 absence of endogenous proteins after KO. The missense variants Wdr11-RC and  
856 Wdr11-MT still produced the full-length proteins although at reduced levels. All variants  
857 were also confirmed by direct Sanger sequencing.

858 **(B)** The phase contrast microscope imaging (scale bar 100 $\mu$ m) and F-actin phalloidin  
859 staining (scale bar 100 $\mu$ m) showed that the gross cell morphology and cytoskeletal  
860 organisation of different NIH3T3-CRISPR/Cas9 cells were not altered significantly. The  
861 primary cilium (scale bar 10 $\mu$ m) was visualised with Arl13B labelling for axoneme (green)  
862 and gamma-tubulin labelling for basal body (red). Representative images are shown.

863 **(C)** NIH3T3 CRISPR/Cas9 cells plated onto the glass cover slips coated with 0.001%  
864 poly-L-lysine in PBS were incubated in serum-free medium for 24 hours to induce primary  
865 cilia formation. The length of the cilia axoneme was measured from WT (n=186), Wdr11-  
866 RC (n=98), Wdr11-MT (n=52), Wdr11 KO (n=101) and Ift88 KO (n=68). The ciliation  
867 frequency was assessed by counting the total number of nuclei and cilia in the random  
868 fields of cells from WT (n=11), Wdr11-RC (n=9), Wdr11-MT (n=10), Wdr11 KO (n=9) and  
869 Ift88 KO (n=16). Error bars represent means  $\pm$  SD after unpaired t-test with Welch's  
870 correction. \*P < 0.01, \*\*\*\*P < 0.0001, ns (non-significant).

871

## 872 **Figure 10. Effects of Wdr11 mutations on primary PGC co-cultures.**

873 **(A)** The mitotic effects of various mutations introduced in NIH3T3 cells are shown as  
874 growth curves. Cells were plated at  $2 \times 10^6$  cells per 10 cm dish in the normal growth  
875 medium and counted at the time points indicated.

876 **(B)** Proliferation of PGCs cultured on different NIH3T3 CRISPR/Cas9 feeder cell layers.  
877 The growth curves were generated by counting GFP-positive cells from 10 random fields  
878 at the time points indicated. The percentage was calculated from the total cell count at 0  
879 hours.

880 **(C)** Intrinsic random motility of PGCs cultured on different NIH3T3 CRISPR/Cas9 feeder  
881 cell layers assessed by live time-lapse imaging (see Supplementary Movies 3 - 7). The  
882 average of accumulated moving distance of 20 GFP-positive cells in random fields of  
883 view tracked for 16 hours in 3 biologically independent experiments are shown. Error bars  
884 represent means  $\pm$  SD after unpaired t-test with Welch's correction. \*P < 0.01, \*\*\*\*P <  
885 0.0001.

886 **(D)** Effects of Shh-N on the motility of PGCs cultured on WT and Wdr11 KO feeder cell  
887 layers (see Supplementary Movies 8 - 11). The average of accumulated moving distance  
888 of 20 GFP-positive cells in random fields of view tracked for 16 hours in 3 biologically  
889 independent experiments are shown. Error bars represent means  $\pm$  SD after unpaired t-  
890 test with Welch's correction. PGCs on WT feeder were increased by  $30.2\pm 0.6\%$  upon  
891 Shh-N treatment, while those on Wdr11 KO feeder were increased by  $22.9\pm 0.7\%$ .

892

893

894

## Reference List

895

896

897

(1) Kim SH. Congenital Hypogonadotropic Hypogonadism and Kallmann Syndrome: Past, Present, and Future. *Endocrinol Metab (Seoul)* 2015 Dec;30(4):456-66.

898

899

900

901

(2) Dewailly D, Boucher A, Decanter C, Lagarde JP, Counis R, Kottler ML. Spontaneous pregnancy in a patient who was homozygous for the Q106R mutation in the gonadotropin-releasing hormone receptor gene. *Fertil Steril* 2002 Jun;77(6):1288-91.

902

903

904

905

(3) Seminara SB, Beranova M, Oliveira LM, Martin KA, Crowley WF, Jr., Hall JE. Successful use of pulsatile gonadotropin-releasing hormone (GnRH) for ovulation induction and pregnancy in a patient with GnRH receptor mutations. *J Clin Endocrinol Metab* 2000 Feb;85(2):556-62.

906

907

908

909

(4) Sykiotis GP, Hoang XH, Avbelj M, Hayes FJ, Thambundit A, Dwyer A, et al. Congenital idiopathic hypogonadotropic hypogonadism: evidence of defects in the hypothalamus, pituitary, and testes. *J Clin Endocrinol Metab* 2010 Jun;95(6):3019-27.

910

911

912

913

914

(5) Pitteloud N, Hayes FJ, Boepple PA, DeCruz S, Seminara SB, MacLaughlin DT, et al. The role of prior pubertal development, biochemical markers of testicular maturation, and genetics in elucidating the phenotypic heterogeneity of idiopathic hypogonadotropic hypogonadism. *J Clin Endocrinol Metab* 2002 Jan;87(1):152-60.

915

916

917

918

(6) Burriss AS, Rodbard HW, Winters SJ, Sherins RJ. Gonadotropin therapy in men with isolated hypogonadotropic hypogonadism: the response to human chorionic gonadotropin is predicted by initial testicular size. *J Clin Endocrinol Metab* 1988 Jun;66(6):1144-51.

919

920

921

922

923

(7) Kim HG, Ahn JW, Kurth I, Ullmann R, Kim HT, Kulharya A, et al. WDR11, a WD protein that interacts with transcription factor EMX1, is mutated in idiopathic hypogonadotropic hypogonadism and Kallmann syndrome. *Am J Hum Genet* 2010 Oct 8;87(4):465-79.

924

925

926

(8) Raivio T, Avbelj M, McCabe MJ, Romero CJ, Dwyer AA, Tommiska J, et al. Genetic overlap in Kallmann syndrome, combined pituitary hormone deficiency, and septo-optic dysplasia. *J Clin Endocrinol Metab* 2012 Apr;97(4):E694-E699.

927

928

929

(9) McCormack SE, Li D, Kim YJ, Lee JY, Kim SH, Rapaport R, et al. Digenic Inheritance of PROKR2 and WDR11 Mutations in Pituitary Stalk Interruption Syndrome. *J Clin Endocrinol Metab* 2017 Jul 1;102(7):2501-7.

930

931

932

(10) Izumi Y, Suzuki E, Kanzaki S, Yatsuga S, Kinjo S, Igarashi M, et al. Genome-wide copy number analysis and systematic mutation screening in 58 patients with hypogonadotropic hypogonadism. *Fertil Steril* 2014 Oct;102(4):1130-6.

933

934

(11) Jain BP, Pandey S. WD40 Repeat Proteins: Signalling Scaffold with Diverse Functions. *Protein J* 2018 Oct;37(5):391-406.

- 935 (12) Kim YJ, Osborn DP, Lee JY, Araki M, Araki K, Mohun T, et al. WDR11-mediated  
936 Hedgehog signalling defects underlie a new ciliopathy related to Kallmann  
937 syndrome. *EMBO Rep* 2018 Dec;19(2):269-289.
- 938 (13) Runyan C, Schaible K, Molyneaux K, Wang Z, Levin L, Wylie C. Steel factor  
939 controls midline cell death of primordial germ cells and is essential for their normal  
940 proliferation and migration. *Development* 2006 Dec;133(24):4861-9.
- 941 (14) Kunwar PS, Siekhaus DE, Lehmann R. In vivo migration: a germ cell perspective.  
942 *Annu Rev Cell Dev Biol* 2006;22:237-65.
- 943 (15) Gu Y, Runyan C, Shoemaker A, Surani A, Wylie C. Steel factor controls primordial  
944 germ cell survival and motility from the time of their specification in the allantois,  
945 and provides a continuous niche throughout their migration. *Development* 2009  
946 Apr;136(8):1295-303.
- 947 (16) Knaut H, Werz C, Geisler R, Nusslein-Volhard C. A zebrafish homologue of the  
948 chemokine receptor Cxcr4 is a germ-cell guidance receptor. *Nature* 2003 Jan  
949 16;421(6920):279-82.
- 950 (17) Doitsidou M, Reichman-Fried M, Stebler J, Kopranner M, Dorries J, Meyer D, et  
951 al. Guidance of primordial germ cell migration by the chemokine SDF-1. *Cell* 2002  
952 Nov 27;111(5):647-59.
- 953 (18) Schwarting GA, Henion TR, Nugent JD, Caplan B, Tobet S. Stromal cell-derived  
954 factor-1 (chemokine C-X-C motif ligand 12) and chemokine C-X-C motif receptor  
955 4 are required for migration of gonadotropin-releasing hormone neurons to the  
956 forebrain. *J Neurosci* 2006 Jun 21;26(25):6834-40.
- 957  
958 (19) Izzi L, Levesque M, Morin S, Laniel D, Wilkes BC, Mille F, et al. Boc and Gas1  
959 each form distinct Shh receptor complexes with Ptch1 and are required for Shh-  
960 mediated cell proliferation. *Dev Cell* 2011 Jun 14;20(6):788-801.
- 961 (20) Kim Y, Lee J, Seppala M, Cobourne MT, Kim SH. Ptch2/Gas1 and Ptch1/Boc  
962 differentially regulate Hedgehog signalling in murine primordial germ cell migration.  
963 *Nat Commun* 2020 Apr 24;11(1):1994.
- 964 (21) Kang JS, Gao M, Feinleib JL, Cotter PD, Guadagno SN, Krauss RS. CDO: an  
965 oncogene-, serum-, and anchorage-regulated member of the Ig/fibronectin type III  
966 repeat family. *J Cell Biol* 1997 Jul 14;138(1):203-13.
- 967 (22) Kang JS, Mulieri PJ, Hu Y, Taliana L, Krauss RS. BOC, an Ig superfamily member,  
968 associates with CDO to positively regulate myogenic differentiation. *EMBO J* 2002  
969 Jan 15;21(1-2):114-24.
- 970 (23) Bijlsma MF, Borensztajn KS, Roelink H, Peppelenbosch MP, Spek CA. Sonic  
971 hedgehog induces transcription-independent cytoskeletal rearrangement and  
972 migration regulated by arachidonate metabolites. *Cell Signal* 2007  
973 Dec;19(12):2596-604.
- 974 (24) Bijlsma MF, Damhofer H, Roelink H. Hedgehog-stimulated chemotaxis is  
975 mediated by smoothed located outside the primary cilium. *Sci Signal* 2012 Aug  
976 21;5(238):ra60.

- 977 (25) Renault AD, Ricardo S, Kunwar PS, Santos A, Starz-Gaiano M, Stein JA, et al.  
978 Hedgehog does not guide migrating *Drosophila* germ cells. *Dev Biol* 2009 Apr  
979 15;328(2):355-62.
- 980 (26) Mich JK, Blaser H, Thomas NA, Firestone AJ, Yelon D, Raz E, et al. Germ cell  
981 migration in zebrafish is cyclopamine-sensitive but Smoothed-independent. *Dev*  
982 *Biol* 2009 Apr 15;328(2):342-54.
- 983 (27) Deshpande G, Godishala A, Schedl P. Ggamma1, a downstream target for the  
984 hmgcr-isoprenoid biosynthetic pathway, is required for releasing the Hedgehog  
985 ligand and directing germ cell migration. *PLoS Genet* 2009 Jan;5(1):e1000333.
- 986 (28) Barraud S, Delemer B, Poirsier-Violle C, Bouligand J, Merol JC, Grange F, et al.  
987 Congenital hypogonadotropic hypogonadism with anosmia and Gorlin features  
988 caused by a PTCH1 mutation reveals a new candidate gene for Kallmann  
989 syndrome. *Neuroendocrinology* 2020 Feb 20.
- 990 (29) Quaynor SD, Bosley ME, Duckworth CG, Porter KR, Kim SH, Kim HG, et al.  
991 Targeted next generation sequencing approach identifies nineteen new candidate  
992 genes in normosmic hypogonadotropic hypogonadism and Kallmann Syndrome.  
993 *Mol Cell Endocrinol* 2016 Aug 5.
- 994 (30) Vaaralahti K, Raivio T, Koivu R, Valanne L, Laitinen EM, Tommiska J. Genetic  
995 Overlap between Holoprosencephaly and Kallmann Syndrome. *Mol Syndromol*  
996 2012 Jun;3(1):1-5.
- 997 (31) Payer B, Chuva de Sousa Lopes SM, Barton SC, Lee C, Saitou M, Surani MA.  
998 Generation of stella-GFP transgenic mice: a novel tool to study germ cell  
999 development. *Genesis* 2006 Feb;44(2):75-83.
- 1000 (32) Stallock J, Molyneaux K, Schaible K, Knudson CM, Wylie C. The pro-apoptotic  
1001 gene *Bax* is required for the death of ectopic primordial germ cells during their  
1002 migration in the mouse embryo. *Development* 2003 Dec;130(26):6589-97.
- 1003 (33) Farini D, La SG, Tedesco M, De FM. Chemoattractant action and molecular  
1004 signaling pathways of Kit ligand on mouse primordial germ cells. *Dev Biol* 2007  
1005 Jun 15;306(2):572-83.
- 1006 (34) Minina S, Reichman-Fried M, Raz E. Control of receptor internalization, signaling  
1007 level, and precise arrival at the target in guided cell migration. *Curr Biol* 2007 Jul  
1008 3;17(13):1164-72.
- 1009 (35) Oatley JM, Brinster RL. The germline stem cell niche unit in mammalian testes.  
1010 *Physiol Rev* 2012 Apr;92(2):577-95.
- 1011 (36) Wallace VA. Purkinje-cell-derived Sonic hedgehog regulates granule neuron  
1012 precursor cell proliferation in the developing mouse cerebellum. *Curr Biol* 1999  
1013 Apr 22;9(8):445-8.
- 1014 (37) Shin K, Lee J, Guo N, Kim J, Lim A, Qu L, et al. Hedgehog/Wnt feedback supports  
1015 regenerative proliferation of epithelial stem cells in bladder. *Nature* 2011 Apr  
1016 7;472(7341):110-4.



- 1020 (38) Sanchez-Arrones L, Cardozo M, Nieto-Lopez F, Bovolenta P. Cdon and Boc: Two  
1021 transmembrane proteins implicated in cell-cell communication. *Int J Biochem Cell*  
1022 *Biol* 2012 May;44(5):698-702.
- 1023 (39) Bajestan SN, Umehara F, Shirahama Y, Itoh K, Sharghi-Namini S, Jessen KR, et  
1024 al. Desert hedgehog-patched 2 expression in peripheral nerves during Wallerian  
1025 degeneration and regeneration. *J Neurobiol* 2006 Feb 15;66(3):243-55.
- 1026 (40) Daniel P, Filiz G, Brown DV, Hollande F, Gonzales M, D'Abaco G, et al. Selective  
1027 CREB-dependent cyclin expression mediated by the PI3K and MAPK pathways  
1028 supports glioma cell proliferation. *Oncogenesis* 2014 Jun 30;3:e108.
- 1029 (41) De FM, Dolci S, Pesce M. Proliferation of mouse primordial germ cells in vitro: a  
1030 key role for cAMP. *Dev Biol* 1993 May;157(1):277-80.
- 1031 (42) Gerlinger M, Horswell S, Larkin J, Rowan AJ, Salm MP, Varela I, et al. Genomic  
1032 architecture and evolution of clear cell renal cell carcinomas defined by multiregion  
1033 sequencing. *Nat Genet* 2014 Mar;46(3):225-33.
- 1034 (43) Pazour GJ, Dickert BL, Vucica Y, Seeley ES, Rosenbaum JL, Witman GB, et al.  
1035 *Chlamydomonas* IFT88 and its mouse homologue, polycystic kidney disease gene  
1036 *tg737*, are required for assembly of cilia and flagella. *J Cell Biol* 2000 Oct  
1037 30;151(3):709-18.
- 1038 (44) Godin I, Wylie C, Heasman J. Genital ridges exert long-range effects on mouse  
1039 primordial germ cell numbers and direction of migration in culture. *Development*  
1040 1990 Feb;108(2):357-63.
- 1041 (45) De FM, McLaren A. In vitro culture of mouse primordial germ cells. *Exp Cell Res*  
1042 1983 Apr 1;144(2):417-27.
- 1043 (46) Donovan PJ, Stott D, Cairns LA, Heasman J, Wylie CC. Migratory and  
1044 postmigratory mouse primordial germ cells behave differently in culture. *Cell* 1986  
1045 Mar 28;44(6):831-8.
- 1046 (47) Farini D, Scaldaferrri ML, Iona S, La SG, De FM. Growth factors sustain primordial  
1047 germ cell survival, proliferation and entering into meiosis in the absence of somatic  
1048 cells. *Dev Biol* 2005 Sep 1;285(1):49-56.
- 1049 (48) Leitch HG, Okamura D, Durcova-Hills G, Stewart CL, Gardner RL, Matsui Y, et al.  
1050 On the fate of primordial germ cells injected into early mouse embryos. *Dev Biol*  
1051 2014 Jan 15;385(2):155-9.
- 1052 (49) Tanaka Y, Okada Y, Hirokawa N. FGF-induced vesicular release of Sonic  
1053 hedgehog and retinoic acid in leftward nodal flow is critical for left-right  
1054 determination. *Nature* 2005 May 12;435(7039):172-7.
- 1055 (50) Wood CR, Huang K, Diener DR, Rosenbaum JL. The cilium secretes bioactive  
1056 ectosomes. *Curr Biol* 2013 May 20;23(10):906-11.
- 1057 (51) Phua SC, Chiba S, Suzuki M, Su E, Roberson EC, Pusapati GV, et al. Dynamic  
1058 Remodeling of Membrane Composition Drives Cell Cycle through Primary Cilia  
1059 Excision. *Cell* 2017 Jan 12;168(1-2):264-79.

- 1060 (52) Falardeau J, Chung WC, Beenken A, Raivio T, Plummer L, Sidis Y, et al.  
1061 Decreased FGF8 signaling causes deficiency of gonadotropin-releasing hormone  
1062 in humans and mice. *J Clin Invest* 2008 Aug;118(8):2822-31.
- 1063 (53) Franco B, Guioli S, Pragliola A, Incerti B, Bardoni B, Tonlorenzi R, et al. A gene  
1064 deleted in Kallmann's syndrome shares homology with neural cell adhesion and  
1065 axonal path-finding molecules. *Nature* 1991 Oct 10;353(6344):529-36.
- 1066 (54) Tornberg J, Sykiotis GP, Keefe K, Plummer L, Hoang X, Hall JE, et al. Heparan  
1067 sulfate 6-O-sulfotransferase 1, a gene involved in extracellular sugar modifications,  
1068 is mutated in patients with idiopathic hypogonadotrophic hypogonadism. *Proc Natl  
1069 Acad Sci U S A* 2011 Jul 12;108(28):11524-9.
- 1070 (55) Takeuchi Y, Molyneaux K, Runyan C, Schaible K, Wylie C. The roles of FGF  
1071 signaling in germ cell migration in the mouse. *Development* 2005  
1072 Dec;132(24):5399-409.
- 1073 (56) Kunova BM, Nita A, Gregor T, Varecha M, Gudernova I, Faflek B, et al. Fibroblast  
1074 growth factor receptor influences primary cilium length through an interaction with  
1075 intestinal cell kinase. *Proc Natl Acad Sci U S A* 2019 Mar 5;116(10):4316-25.
- 1076 (57) Neugebauer JM, Amack JD, Peterson AG, Bisgrove BW, Yost HJ. FGF signalling  
1077 during embryo development regulates cilia length in diverse epithelia. *Nature* 2009  
1078 Apr 2;458(7238):651-4.
- 1079 (58) Navarro NP, Edgar JR, Manna PT, Antrobus R, Robinson MS. The WDR11  
1080 complex facilitates the tethering of AP-1-derived vesicles. *Nat Commun* 2018 Feb  
1081 9;9(1):596.
- 1082 (59) Raman M, Sergeev M, Garnaas M, Lydeard JR, Huttlin EL, Goessling W, et al.  
1083 Systematic proteomics of the VCP-UBXD adaptor network identifies a role for  
1084 UBXN10 in regulating ciliogenesis. *Nat Cell Biol* 2015 Oct;17(10):1356-69.
- 1085 (60) Behrends C, Sowa ME, Gygi SP, Harper JW. Network organization of the human  
1086 autophagy system. *Nature* 2010 Jul 1;466(7302):68-76.
- 1087 (61) Kulaga HM, Leitch CC, Eichers ER, Badano JL, Lesemann A, Hoskins BE, et al.  
1088 Loss of BBS proteins causes anosmia in humans and defects in olfactory cilia  
1089 structure and function in the mouse. *Nat Genet* 2004 Sep;36(9):994-8.  
1090  
1091  
1092



Lee et al. Figure 1.

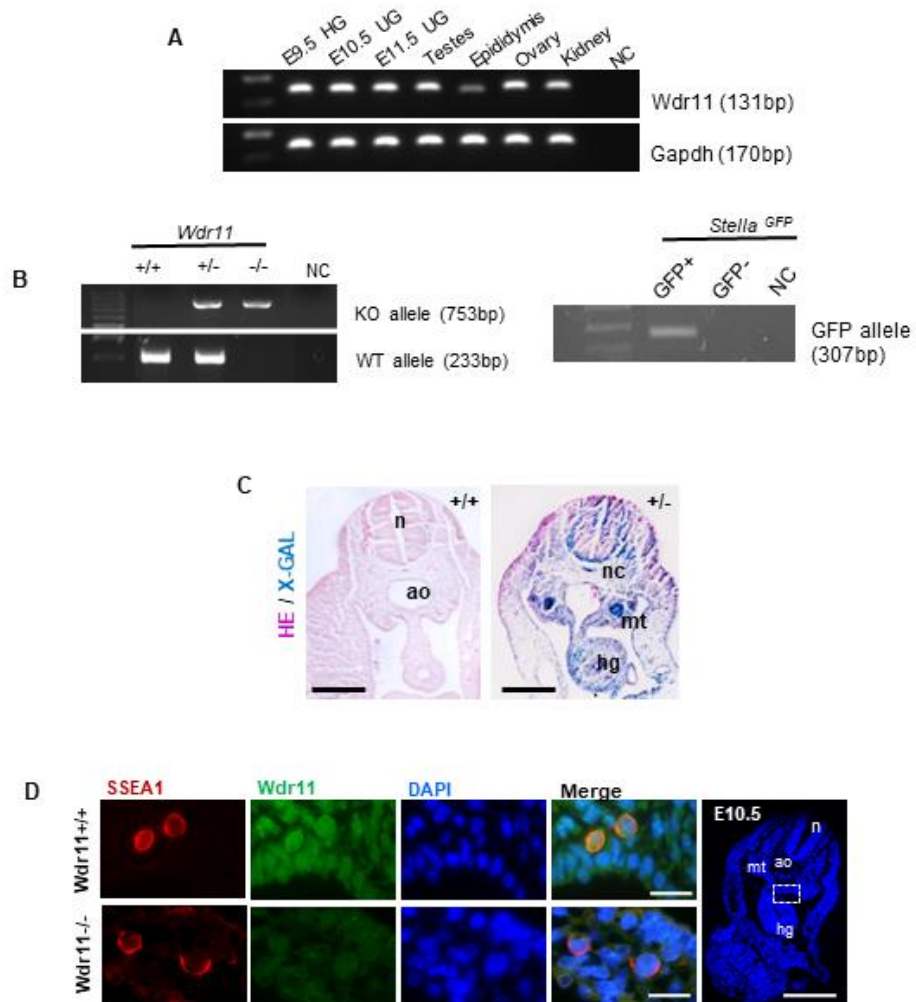

1093

1094

Lee et al. Figure 2.

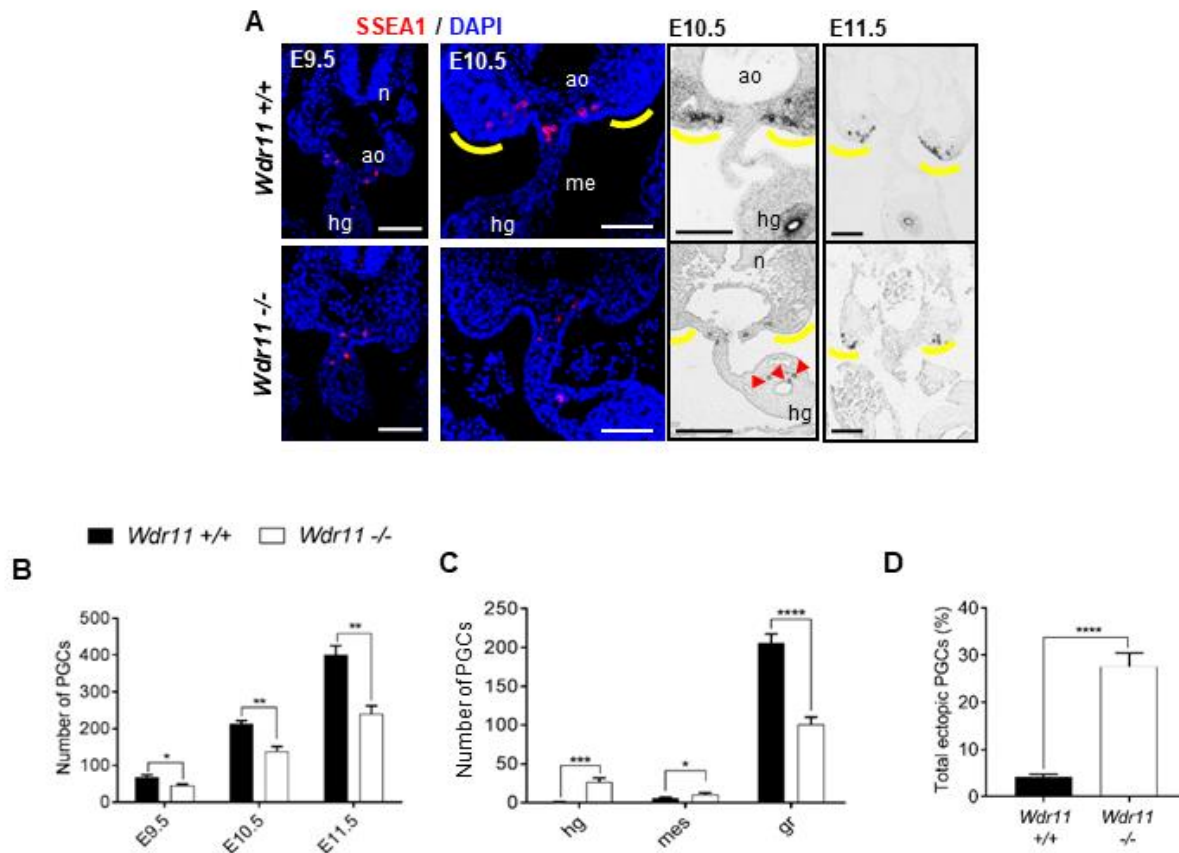

1095

1096

Lee et al. Figure 3.

A

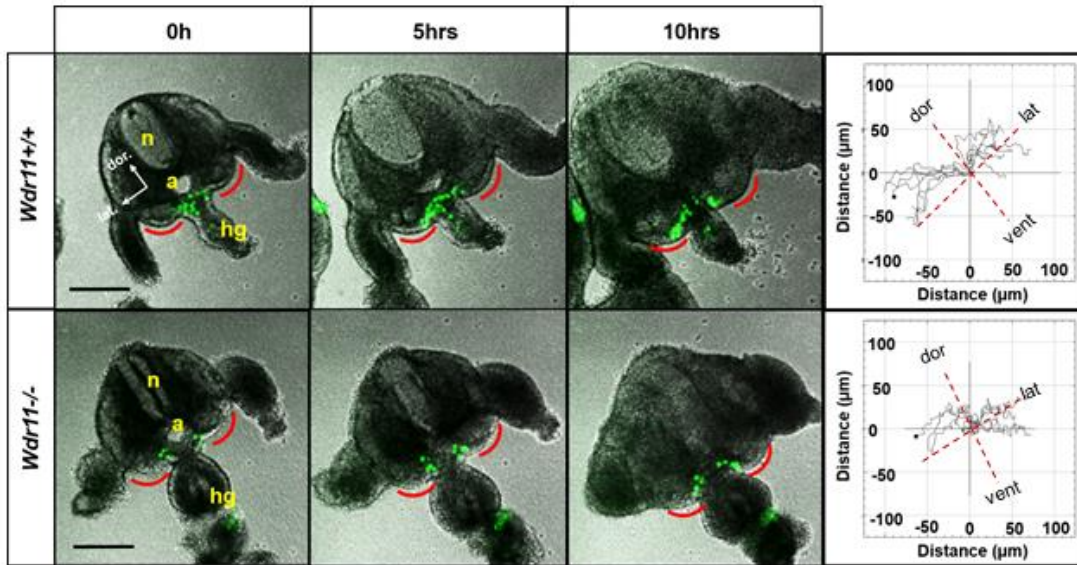

B

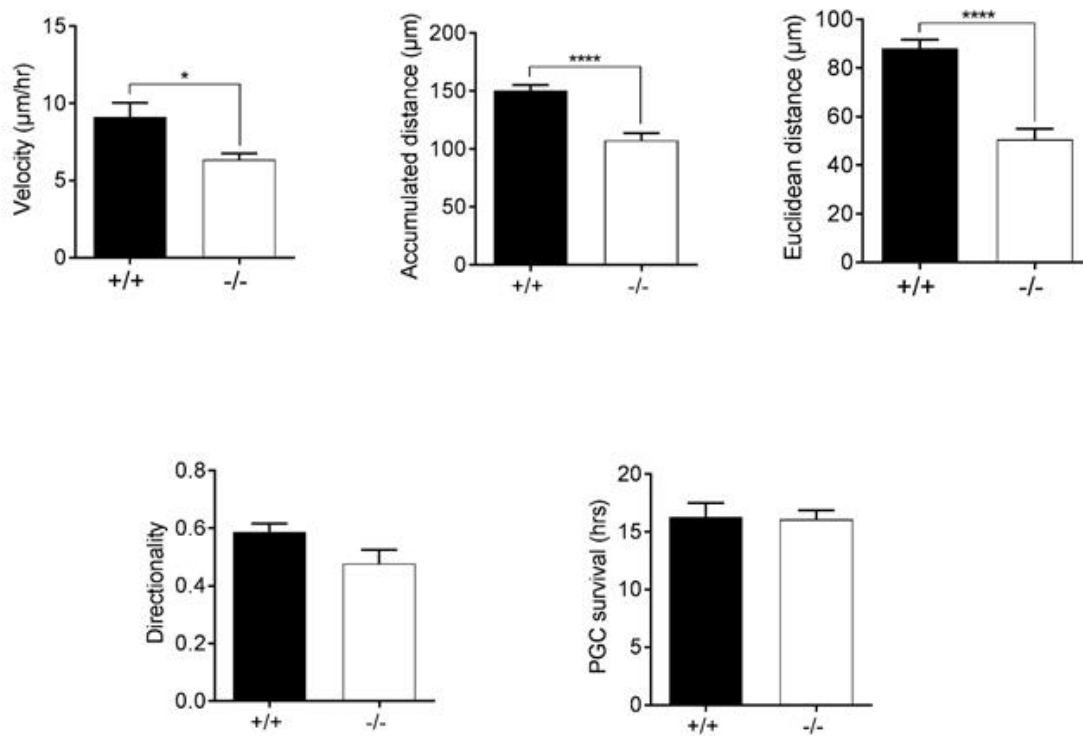

Lee et al. Figure 4.

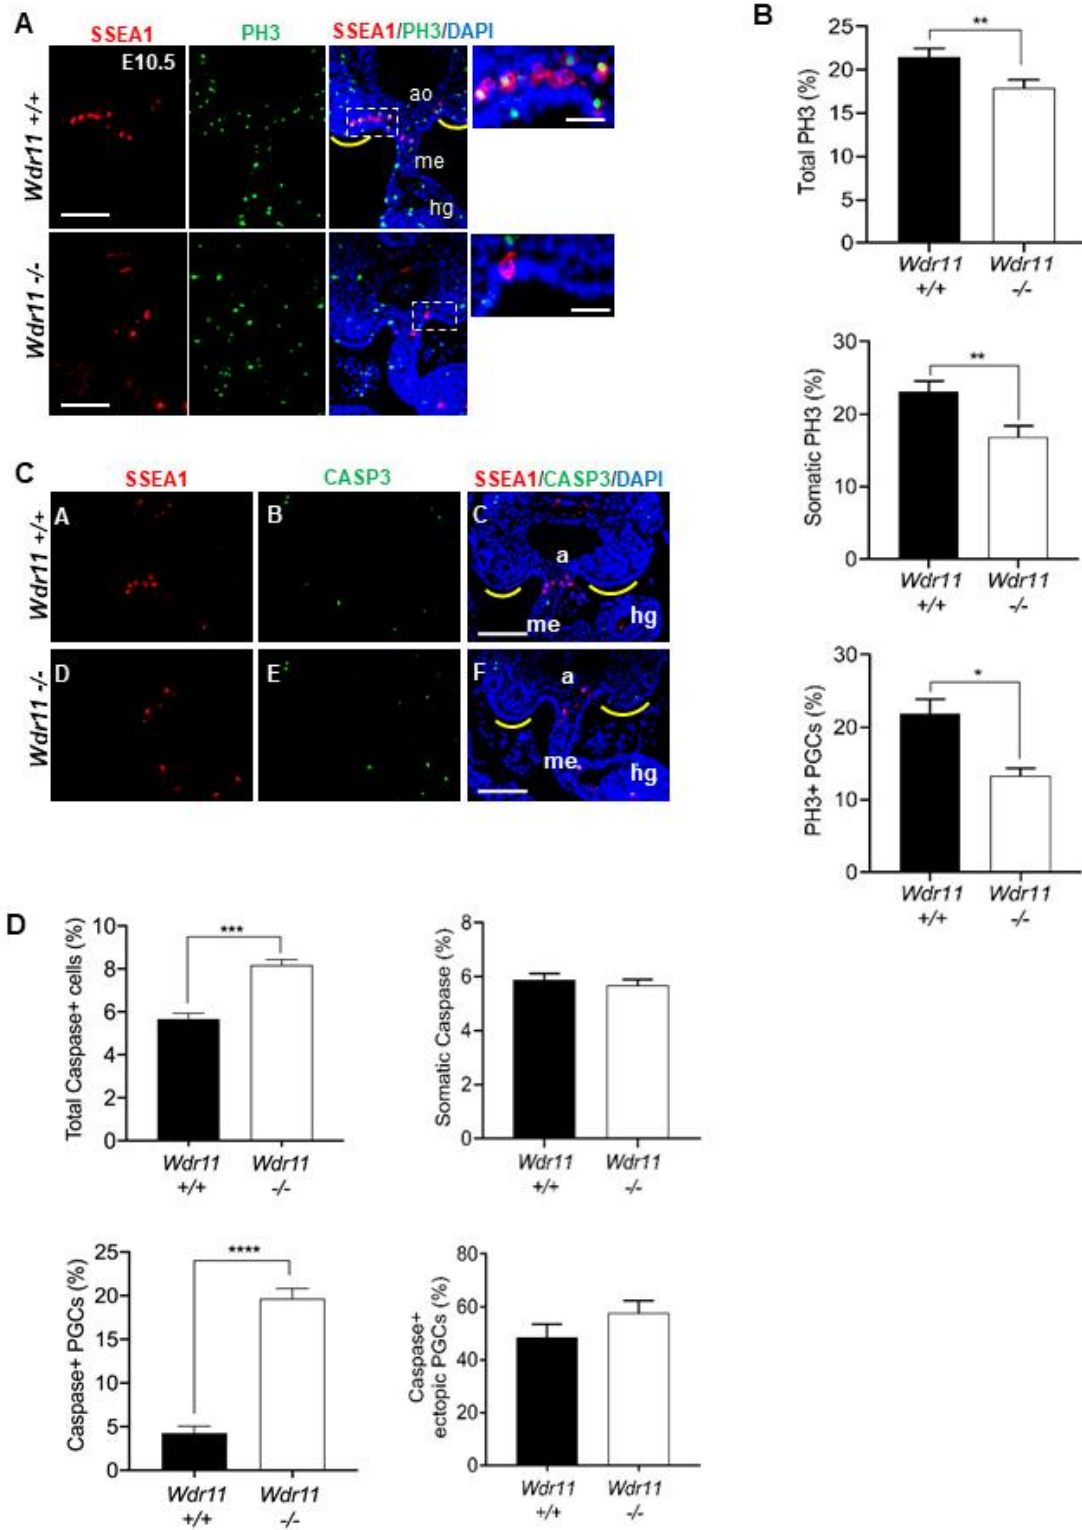

Lee et al. Figure 5.

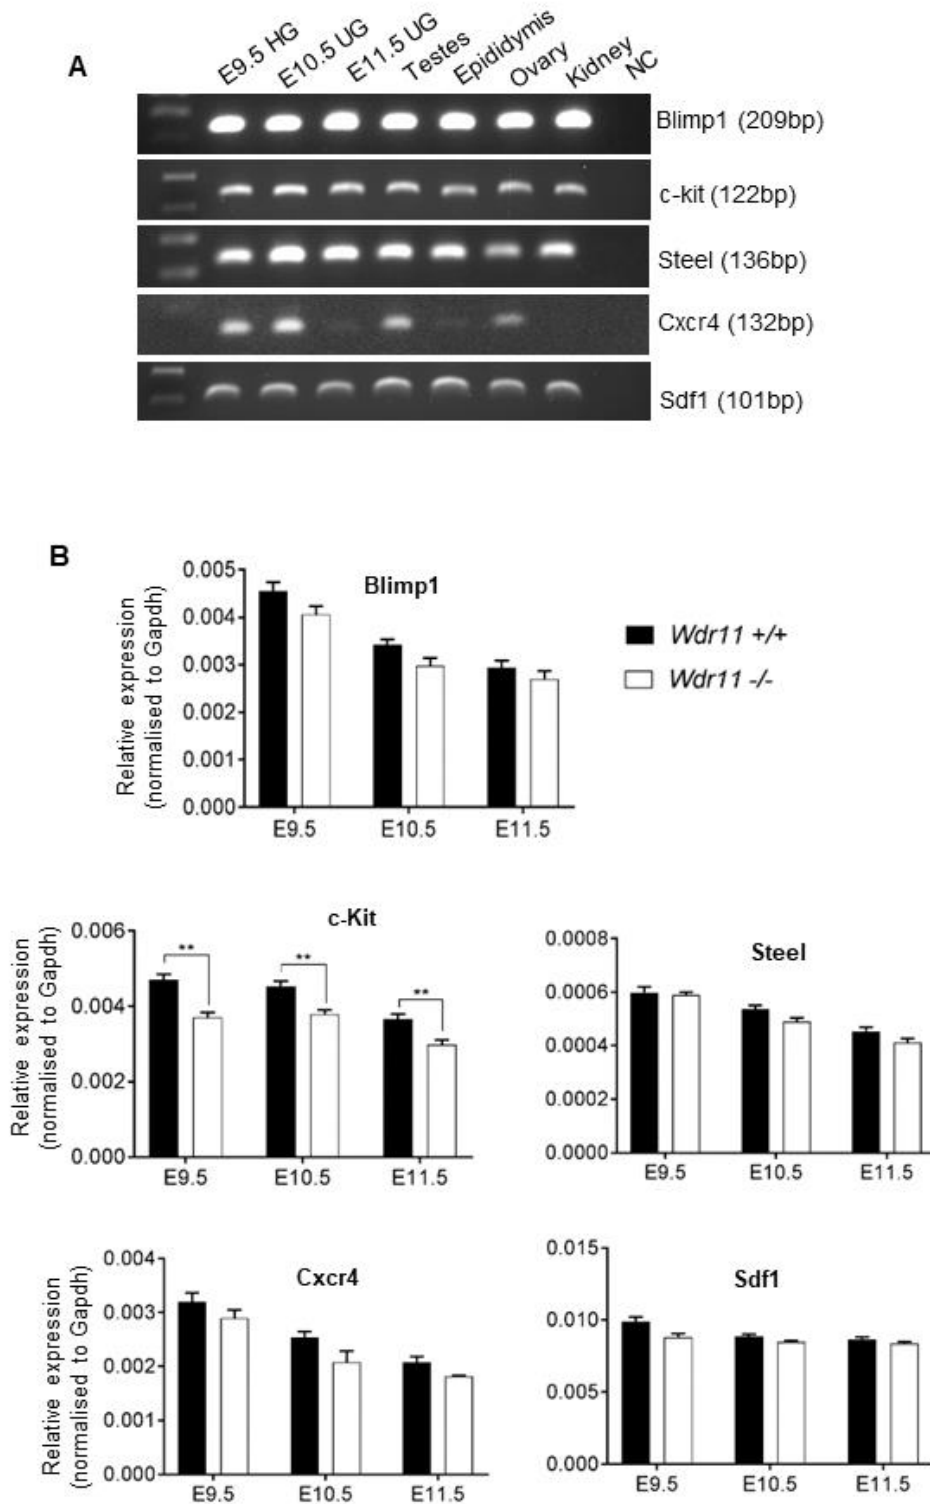

1100  
1101  
1102

Lee et al. Figure 6.

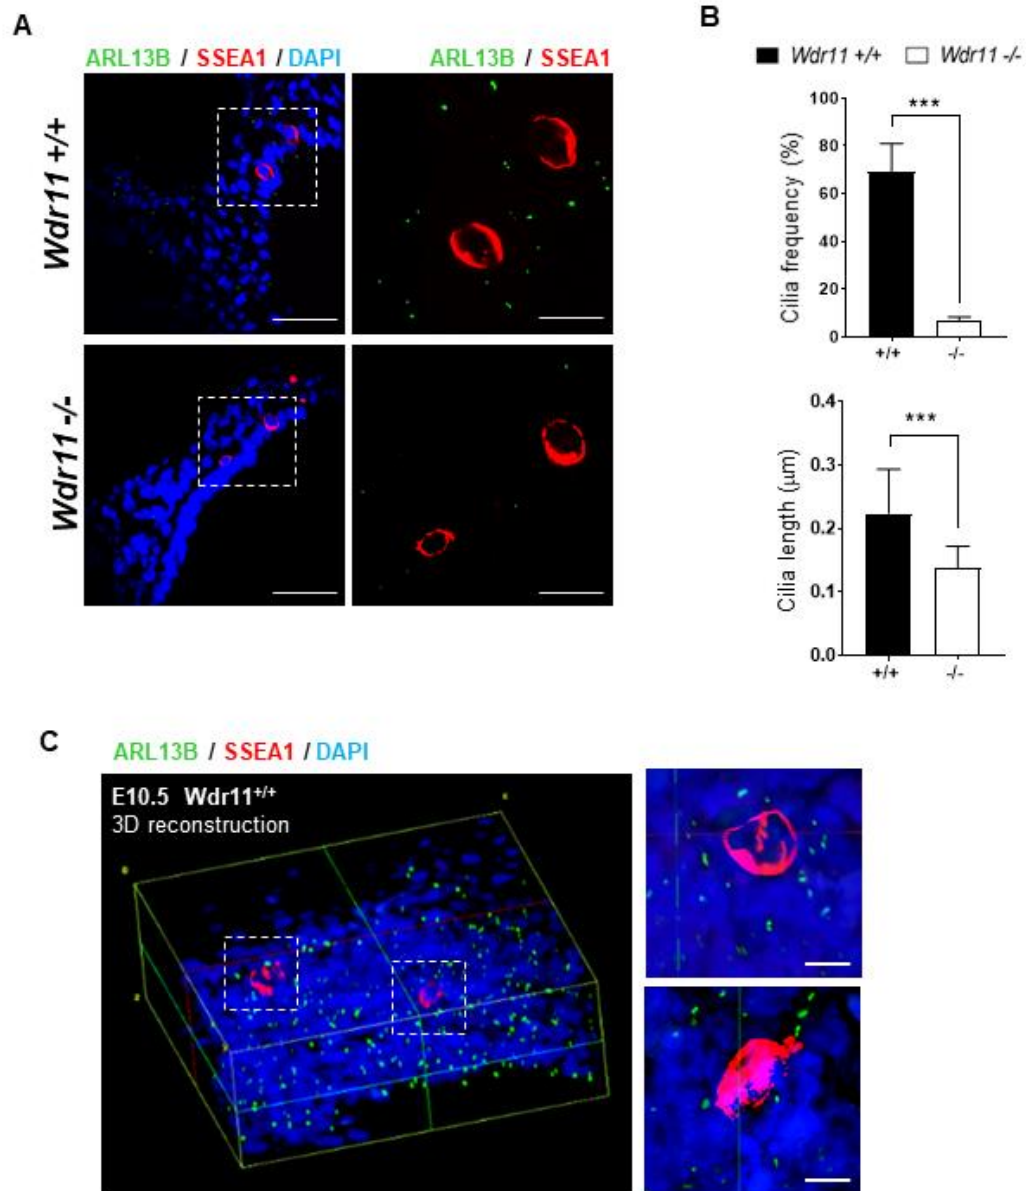

1103  
1104  
1105



Lee et al. Figure 7.

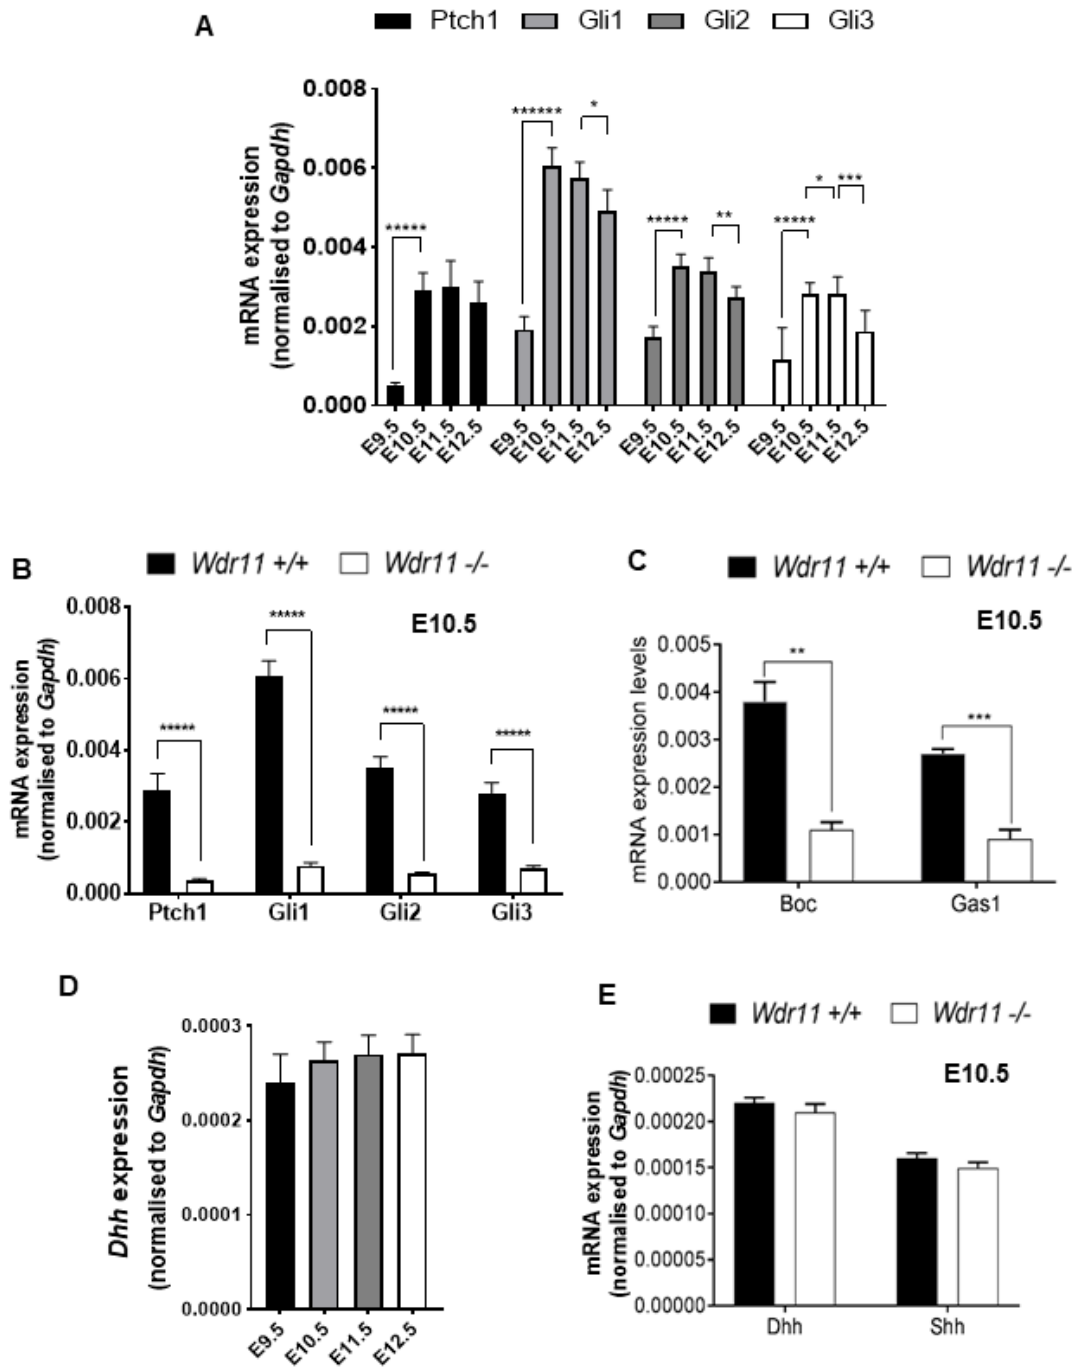

1106  
1107  
1108



Lee et al. Figure 8.

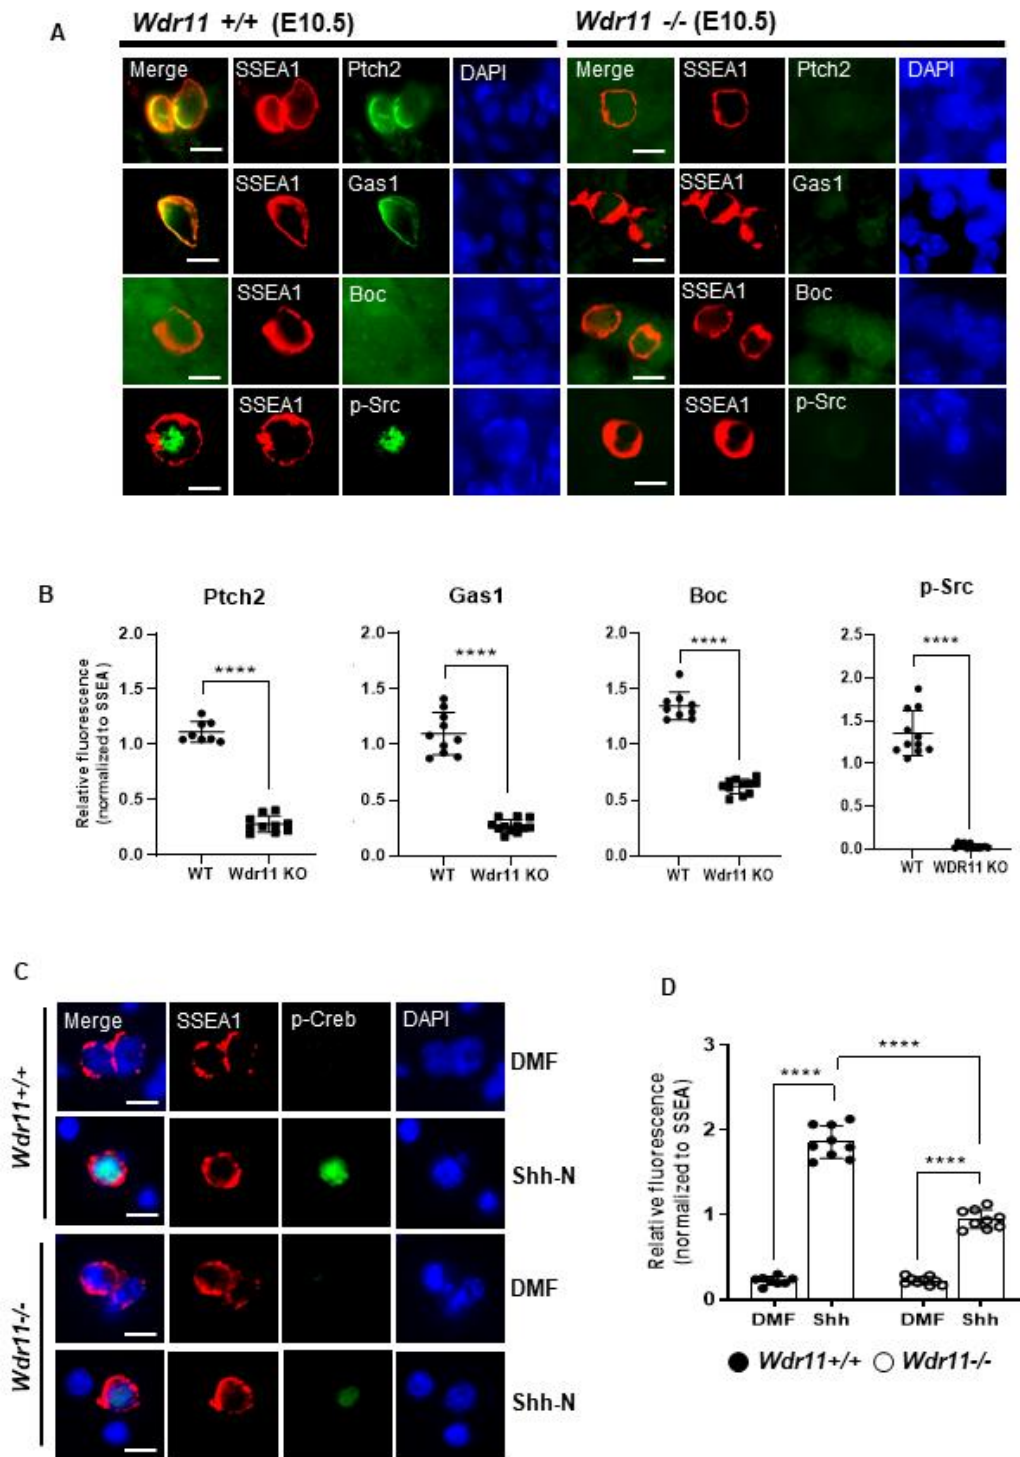

1109  
1110  
1111

Lee et al. Figure 9.

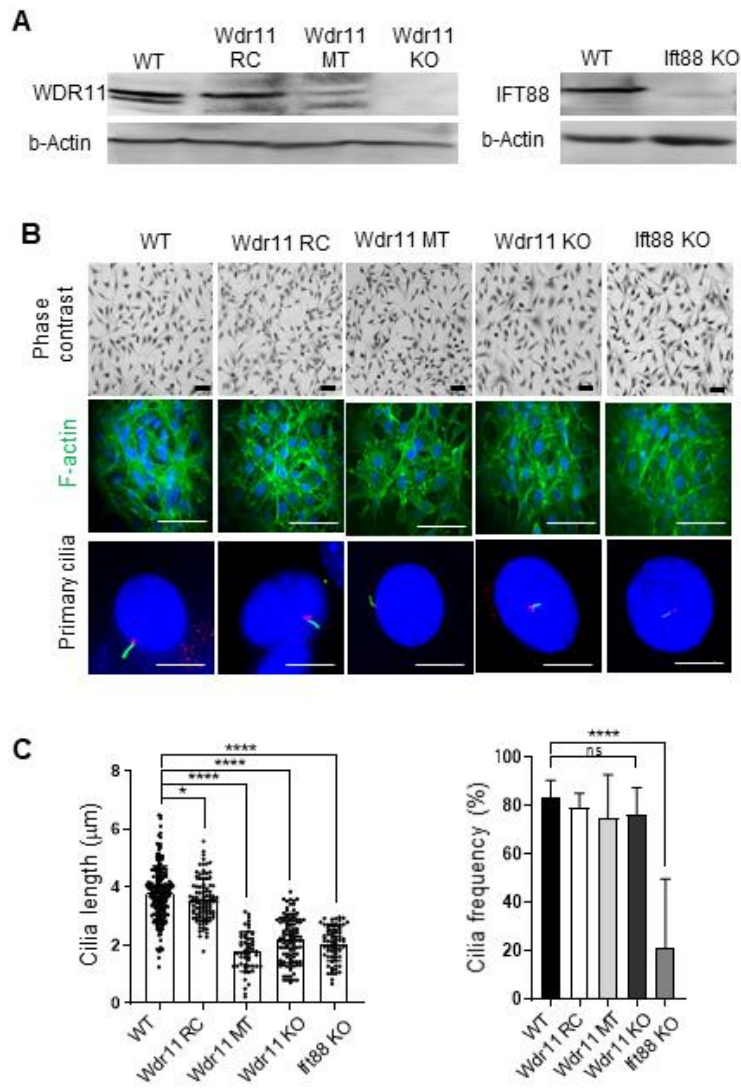

1112  
1113  
1114

Lee et al. Figure 10.

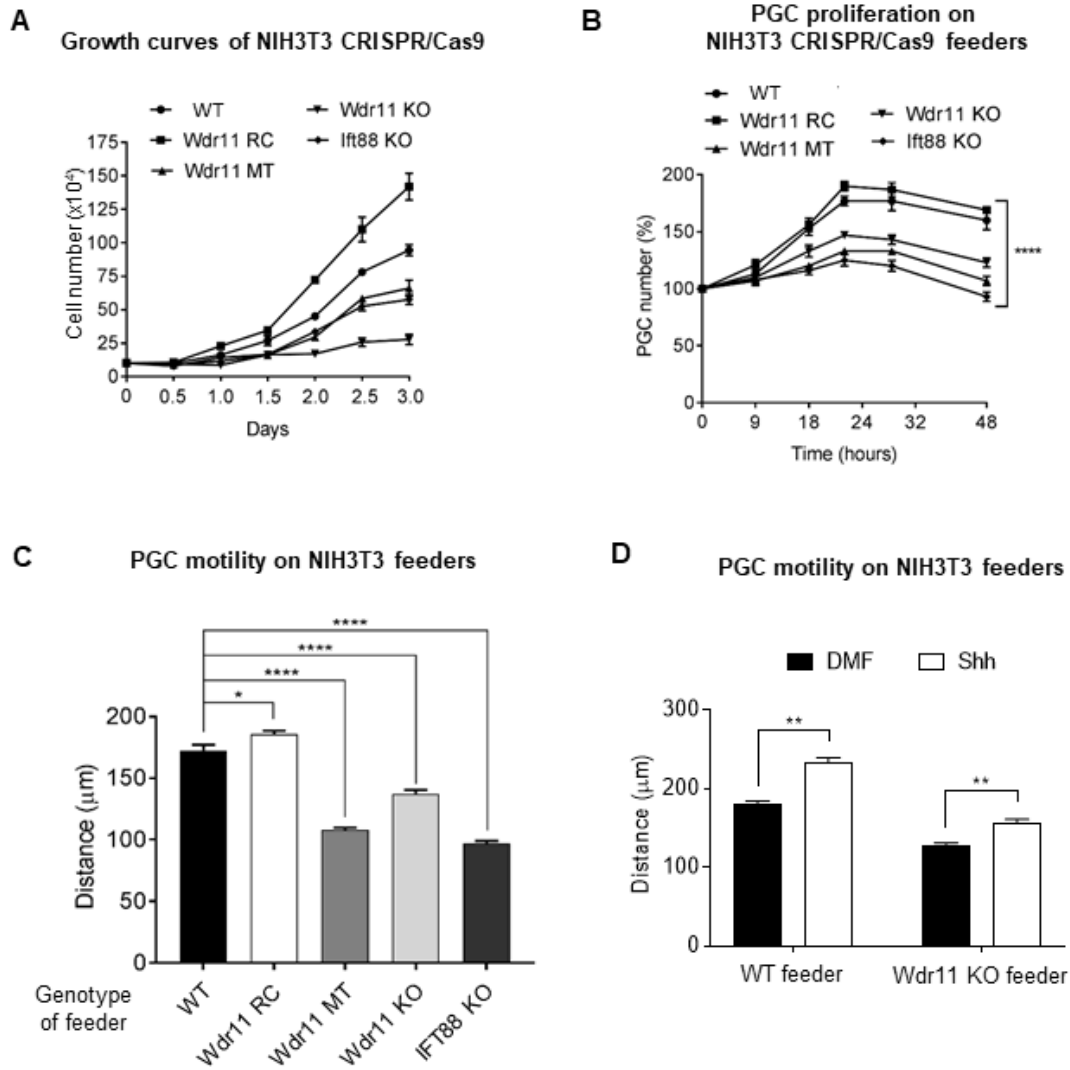

1115  
1116  
1117

1118  
1119  
1120

## SUPPLEMENTARY TABLES

**Supplementary Table 1. List of primers used for mouse genotyping**

| Gene                | Genebank    | T <sub>m</sub> (°C) | Primer sequences (5' to 3')                          | Product size |
|---------------------|-------------|---------------------|------------------------------------------------------|--------------|
| WT allele           | NM_172255.3 | 58                  | F: ATGGCCTGGGATTTGATGACC<br>R: AGAGTGGTCTGAGAGGAAAGG | 233bp        |
| Trapped (KO) allele |             | 58                  | F: ATGGCCTGGGATTTGATGACC<br>R: TGTGAGCGAGTAACAACCCG  | 753bp        |
| <i>GFP</i> allele   | M73708      | 60                  | F: CGACGGCAACTACAAGAC<br>R: TAGTTGTACTIONCCAGCTTGTGC | 307bp        |
| <i>GFP</i> (qPCR)   | M73708      | 60                  | F: CTTTCCCAAGAGAAGGGTCC<br>R: TGCAGAGACATCTGAATGGC   | 107bp        |
| <i>β-Tubulin</i>    | M28739      | 60                  | F: GCCAGAGTGGTGCAGGAAATA<br>R: TCACCACGTCCAGGACAGAGT | 81bp         |

1121  
1122

**Supplementary Table 2. List of primers used for RT-PCR analysis**

| Gene          | Genebank       | T <sub>m</sub> (°C) | Primer sequences (5' to 3')                          | Product size |
|---------------|----------------|---------------------|------------------------------------------------------|--------------|
| <i>Dhh</i>    | NM_007857.5    | 56                  | F: GGGACCTCGTACCCAACTAC<br>R: CTTTGCAACGCTCTGTCATC   | 139bp        |
| <i>Shh</i>    | NM_009170.3    | 60                  | F: CAGCGACTTCCTCACCTTCCT<br>R: AGCGTCTCGATCACGTAGAAG | 129bp        |
| <i>Gapdh</i>  | NM_001289726.1 | 60                  | F: TGTGTCCGTCGTGGATCTGA<br>R: CCTGCTTCACCACCTTCTTGA  | 77bp         |
| <i>Gli1</i>   | NM_010296.2    | 57                  | F: CTATCCTCAGCCTCCCCATG<br>R: CCTCCCACAACAATTCCTGC   | 146bp        |
| <i>Gli2</i>   | NM_001081125.1 | 57                  | F: CAGTCCTGAGCTATCCCAG<br>R: GAGGCTGCATGAGACCAAAG    | 117bp        |
| <i>Gli3</i>   | NM_000168.5    | 57                  | F: CTGCAGTGAGAGTGGACAGG<br>R: GTATCCAGTTGTGGGCTGCT   | 162bp        |
| <i>Ptch1</i>  | NM_000264.3    | 55                  | F: TGTTCCAGTTAATGACTCCC<br>R: ACACTCTGATGAACCACCTC   | 145bp        |
| <i>Blimp1</i> | NM_007548.4    | 55                  | F: CACACAGGAGAGAAGCCACA<br>R: TTGTGACACTGGGCACACTT   | 209bp        |
| <i>c-Kit</i>  | NM_001122733.1 | 55                  | F: TGTAAGGCCTCCAACGATGT<br>R: ACCACAAAGCCAATGAGCAG   | 122bp        |
| <i>Steel</i>  | NM_013598.3    | 55                  | F: AGGTCCCAGAGAAAGATTCCA<br>R: TTGTAGGCCCGAGTCTTCAG  | 136bp        |
| <i>Cxcr4</i>  | NM_009911.3    | 55                  | F: AACCTCTACAGCAGCGTTCT<br>R: GATCCAGACGCCACATAGA    | 132bp        |
| <i>Sdf-1</i>  | NM_001012477.2 | 55                  | F: GCCAACGTCAAGCATCTGAA<br>R: TTCGGGTCAATGCACACTTG   | 101bp        |
| <i>Wdr11</i>  | NM_172255.3    | 60                  | F: CATTGACCAACCACAGCAC<br>R: GACCACGGACGCTAAACATT    | 131bp        |
| <i>Gapdh</i>  | NM_001289726.1 | 60                  | F: TGTGTCCGTCGTGGATCTGA<br>R: CCTGCTTCACCACCTTCTTGA  | 170bp        |

1123  
1124

### Supplementary Table 3. Guide RNAs used for CRISPR/Cas9

| Target gene  | Targeting sequences (200bp) before PAM                         |
|--------------|----------------------------------------------------------------|
| Wdr11(RC)    | F: CACCAAGATAAGCCCCTGGAATTA<br>R: AAATAATTCCAGGGGCTTATCTT      |
| Wdr11(MT/KO) | F: CACCGGATGAACCTTATGAAAGTAG<br>R: AAACCTACTTTTCATAAGGTTTCATCC |
| lft88 (KO)   | F: CACCGGATGAACCTTATGAAAGTAG<br>R: AAACCTACTTTTCATAAGGTTTCATCC |

1125  
1126

### Supplementary Table 4. ssODN for generating point mutations

| Target gene | ssODN sequences (90bp)                                                                              |
|-------------|-----------------------------------------------------------------------------------------------------|
| Wdr11(RC)   | GAAACTTTTTAGACATTTCTCTAAGAAGAGTGCAAGTT<br>CTAATATCCCTTAATTCCAGGGGCTTATCTTTGAAAA<br>CAACTGCCAAATACTG |
| Wdr11(MT)   | GAATGGACAAGCTTGACCAGTTTCCTTTCTTTGCTG<br>CTTCGACCCTAAACAACATGGGGTTAGTAAGAAATG<br>AACTTCAGCTGGTTGAT   |

1127  
1128  
1129

### Supplementary Table 5. Primers used for validation of gene targeting after CRISPR/Cas9

| Target gene   | Primer sequences (5' to 3')                              |
|---------------|----------------------------------------------------------|
| Wdr11 (RC)    | F: ATGCTGTCTGAGTCCTACCCTC<br>R: CCACACAGATCAGTACCCAAGA   |
| Wdr11 (MT/KO) | F: TAGGGGTATTGAATGGACAAGC<br>R: AAACCATGTTGTTTGGGGTCGAAG |
| lft88 (KO)    | F: TAAGAGTGAACGACTGAGTGCC<br>R: TAGACAGTGCAAACCCAATGAC   |

1130  
1131

## SUPPLEMENTARY MOVIE LEGENDS

1132

### Supplementary Movie 1. PGC migration in E10.5 WT embryo.

1133  
1134  
1135  
1136  
1137

A time-lapse movie of an embryo slice culture from *Stella*<sup>GFP+/+</sup>; *Wdr11*<sup>+/+</sup> mouse as described in the Materials and Methods. PGCs are labelled as green fluorescence.

1138

### Supplementary Movie 2. PGC migration in E10.5 Wdr11 KO embryo.

1139  
1140  
1141

A time-lapse movie of an embryo slice culture from *Stella*<sup>GFP+/+</sup>; *Wdr11*<sup>-/-</sup> mouse as described in the Materials and Methods. PGCs are labelled as green fluorescence.

1142

### Supplementary Movie 3. WT genital ridge co-culture on WT feeder.

1143  
1144  
1145

A time-lapse movie of E10.5 *Stella*<sup>GFP+/+</sup> mouse GR cells cultured on WT NIH3T3 cell feeder.

1146

### Supplementary Movie 4. WT genital ridge co-culture on Wdr11-RC feeder.

1147  
1148  
1149

A time-lapse movie of E10.5 *Stella*<sup>GFP+/+</sup> mouse GR cells cultured on NIH3T3 cell feeder edited for Wdr11-RC mutation.

1150

### Supplementary Movie 5. WT genital ridge co-culture on Wdr11-MT feeder.

1151  
1152  
1153

A time-lapse movie of E10.5 *Stella*<sup>GFP+/+</sup> mouse GR cells cultured on NIH3T3 cell feeder edited for Wdr11-MT mutation.

1154

### Supplementary Movie 6. WT genital ridge co-culture on Wdr11 KO feeder.

1155 A time-lapse movie of E10.5 *Stella*<sup>GFP+/+</sup> mouse GR cells cultured on NIH3T3 cell feeder  
1156 with *Wdr11* KO.

1157

1158 **Supplementary Movie 7. WT genital ridge co-culture on IFT88 KO feeder.**

1159 A time-lapse movie of E10.5 *Stella*<sup>GFP+/+</sup> mouse GR cells cultured on NIH3T3 cell feeder  
1160 with IFT88 KO.

1161

1162 **Supplementary Movie 8. WT genital ridge co-culture on WT feeder treated with**  
1163 **DMF.**

1164 A time-lapse movie of E10.5 *Stella*<sup>GFP+/+</sup> mouse GR cells cultured on WT NIH3T3 cell  
1165 feeder after treatment with DMF.

1166

1167 **Supplementary Movie 9. WT genital ridge co-culture on WT feeder treated with**  
1168 **Shh-N.**

1169 A time-lapse movie of E10.5 *Stella*<sup>GFP+/+</sup> mouse GR cells cultured on WT NIH3T3 cell  
1170 feeder after treatment with Shh-N.

1171

1172 **Supplementary Movie 10. WT genital ridge co-culture on *Wdr11* KO feeder treated**  
1173 **with DMF.**

1174 A time-lapse movie of E10.5 *Stella*<sup>GFP+/+</sup> mouse GR cells cultured on NIH3T3 cell feeder  
1175 with *Wdr11* KO after treatment with DMF.

1176

1177 **Supplementary Movie 11. WT genital ridge co-culture on *Wdr11* KO feeder treated**  
1178 **with Shh-N.**

1179 A time-lapse movie of E10.5 *Stella*<sup>GFP+/+</sup> mouse GR cells cultured on NIH3T3 cell feeder  
1180 with *Wdr11* KO after treatment with Shh-N.

1181

1182
